# Supplementary material for: Fire-resistant propargyl ether networks derived from bio-based hydroxycinnamic acids
Source: Royal Society of Chemistry journal article supplement (doi:10.1039/d4ma00610k), 2024-01-01
Supplement: d4ma00610k1.pdf [file d4ma00610k1.pdf]

## Supporting Information

### **Fire-Resistant Propargyl Ether Networks Derived from Bio-Based Hydroxycinnamic Acids**

Cristian E. Zavala, Joshua E. Baca, Lawrence C. Baldwin, K. Randall McClain, and Benjamin G. Harvey\*

*US NAVY, NAWCWD, Research Department, Chemistry Division, China Lake, California 93555*

#### **Table of Contents**

|                                                    |     |
|----------------------------------------------------|-----|
| Thermal analysis of thermosets .....               | S2  |
| Microscale combustion calorimetry (MCC) data ..... | S21 |
| Crystallographic data .....                        | S28 |
| IR spectra of cured thermosets and monomers .....  | S32 |
| NMR spectra of isolated compounds.....             | S34 |

## Thermal Analysis of Thermosets

Figure S1. Differential scanning calorimetry trace for CD (exo = up)

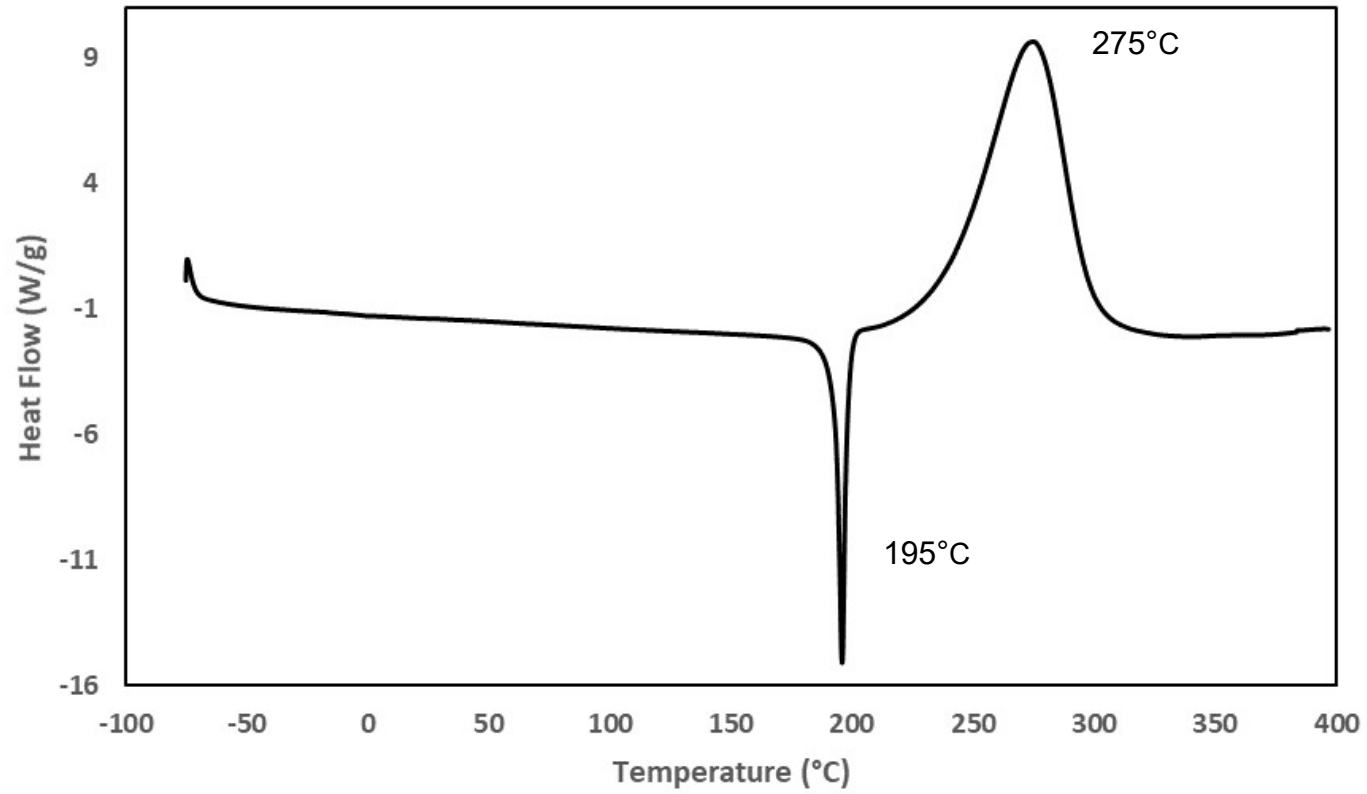

Figure S2. Thermogravimetric analysis of cross-linked CD

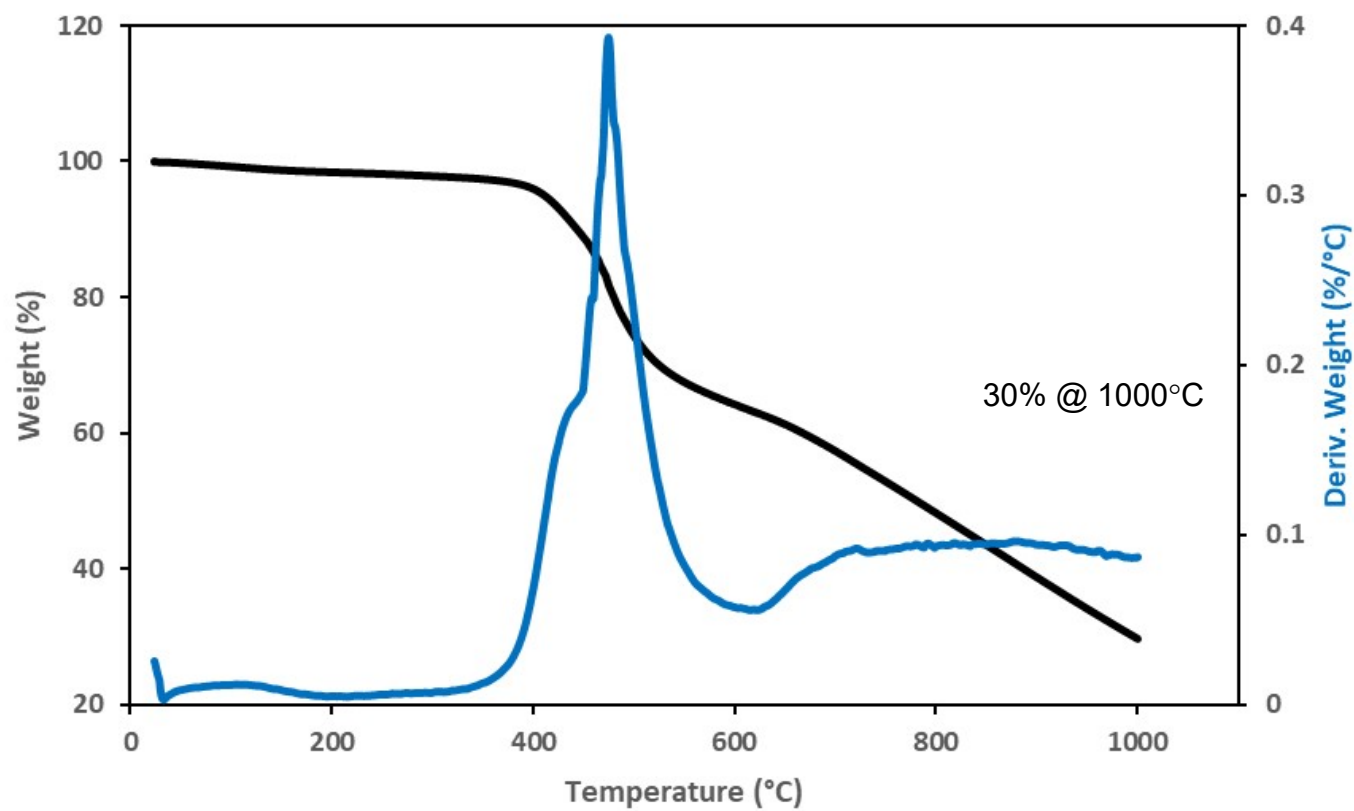

Figure S3. Thermomechanical analysis of cross-linked CD

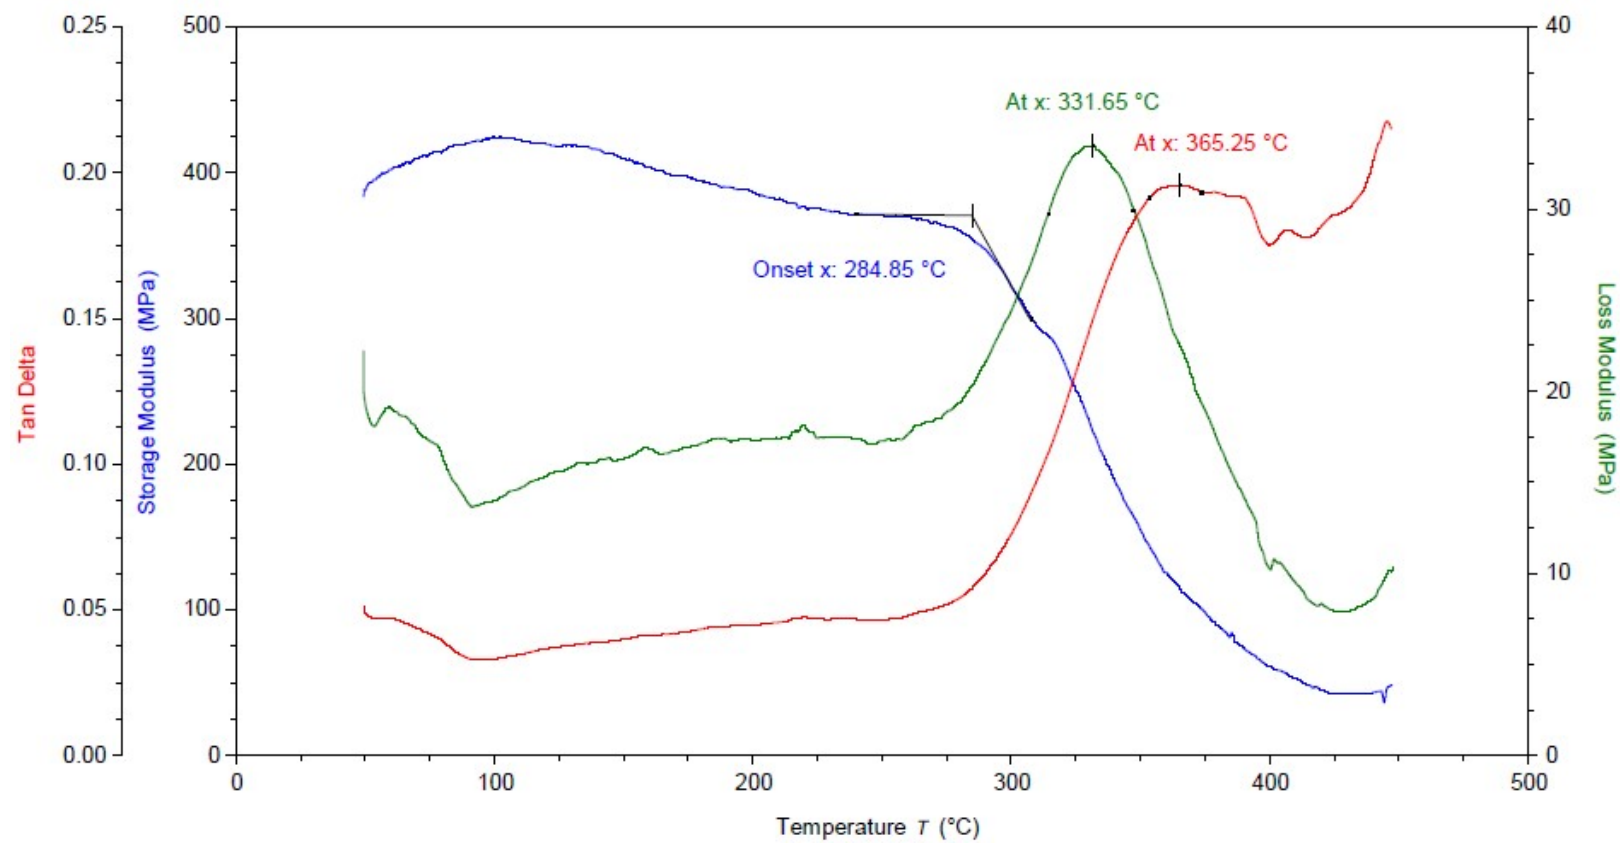

Figure S4. Differential scanning calorimetry trace for FD (exo = up)

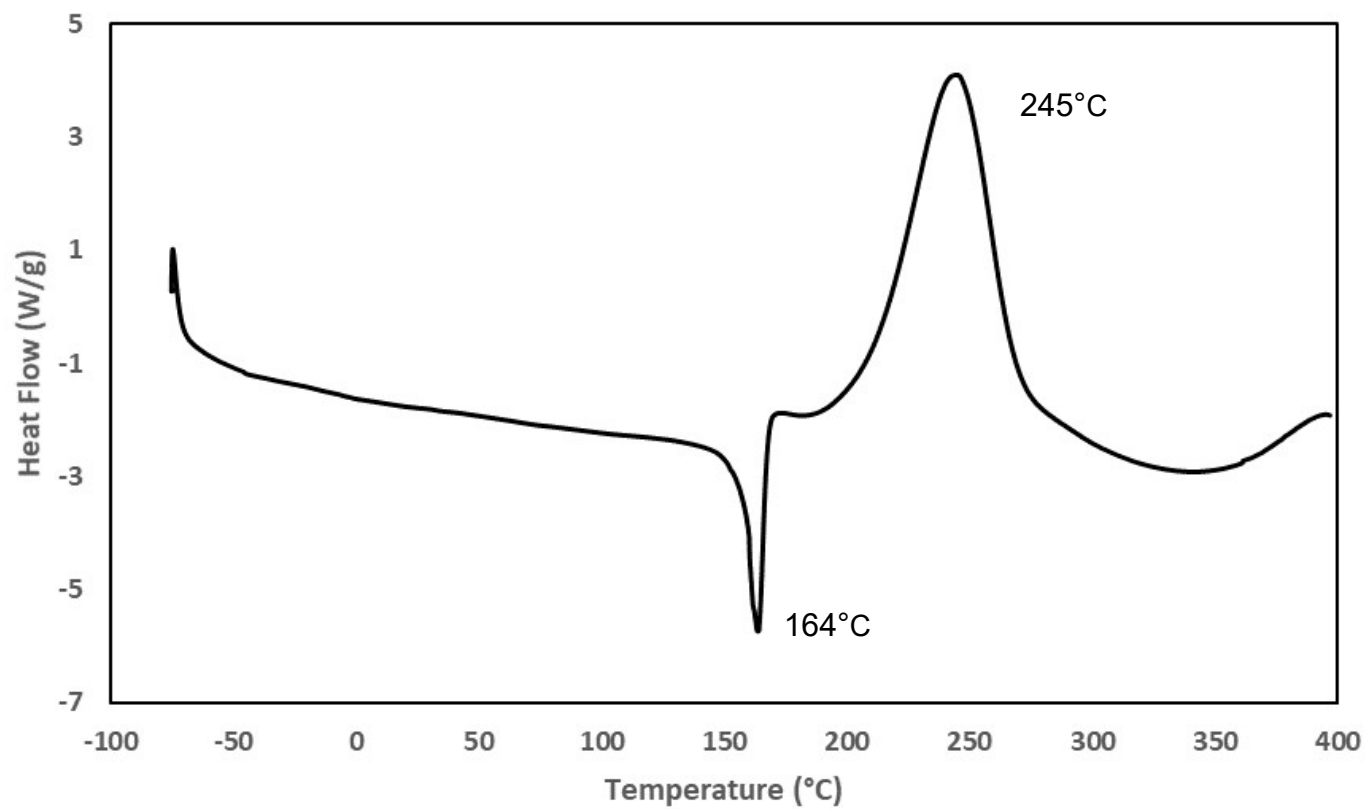

Figure S5. Thermogravimetric analysis of cross-linked FD

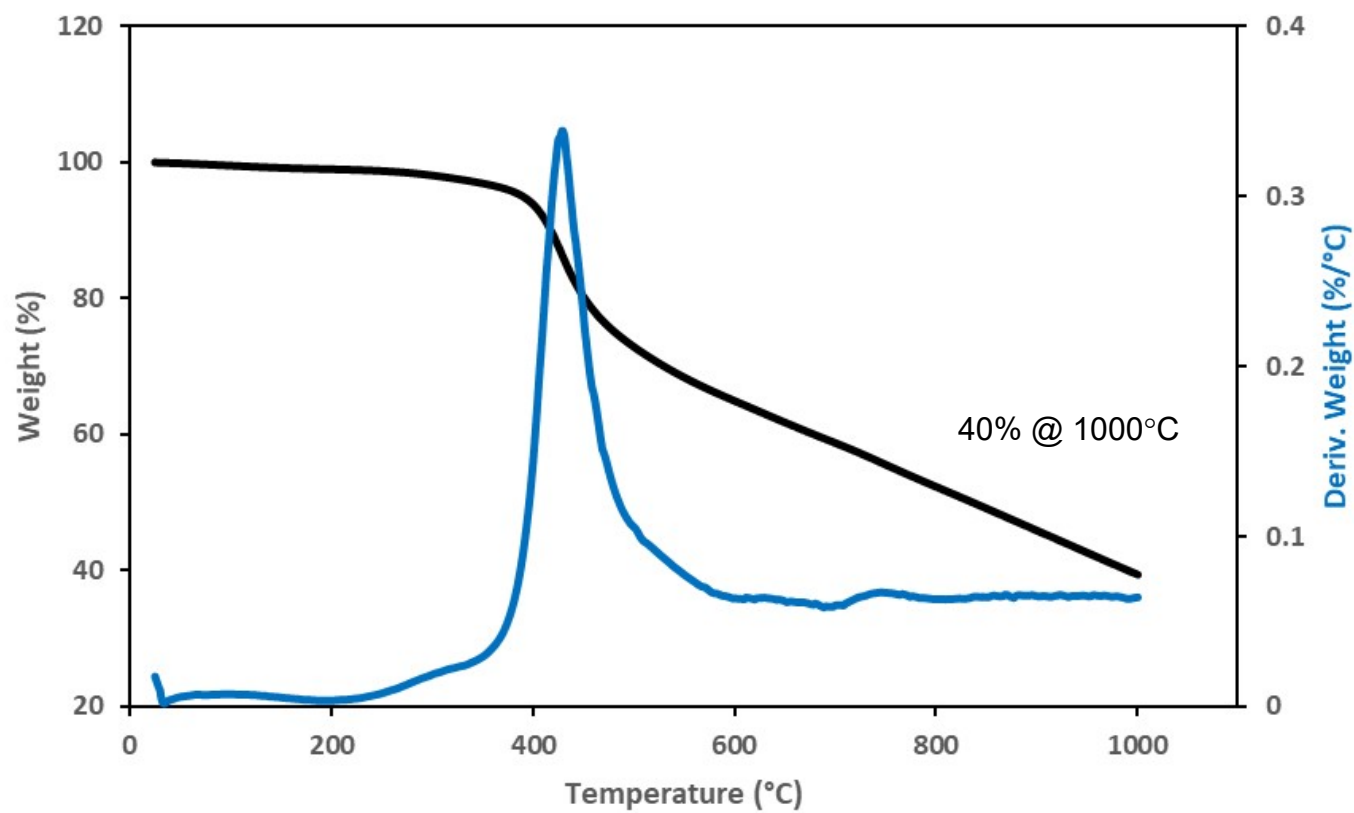

Figure S6. Differential scanning calorimetry trace for SD (exo = up)

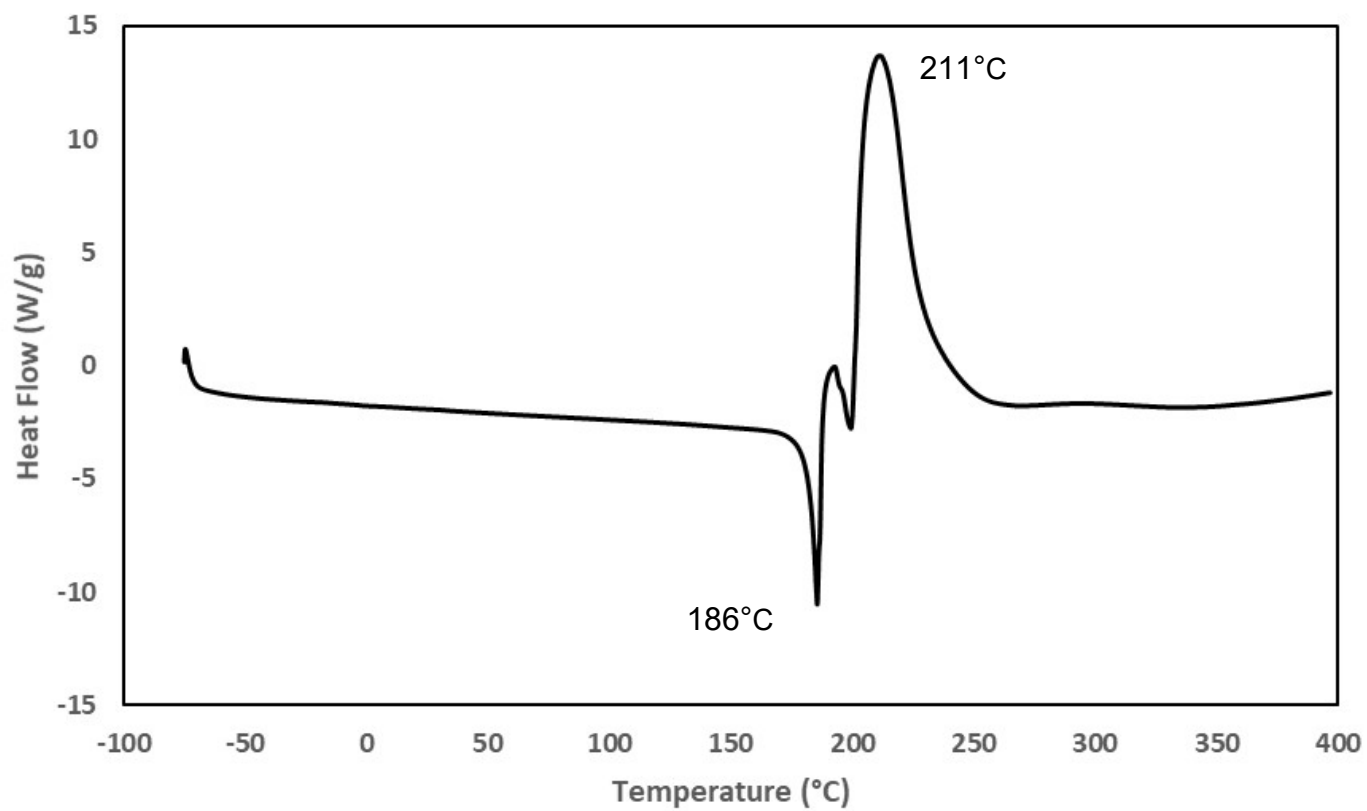

Figure S7. Thermogravimetric analysis of SD

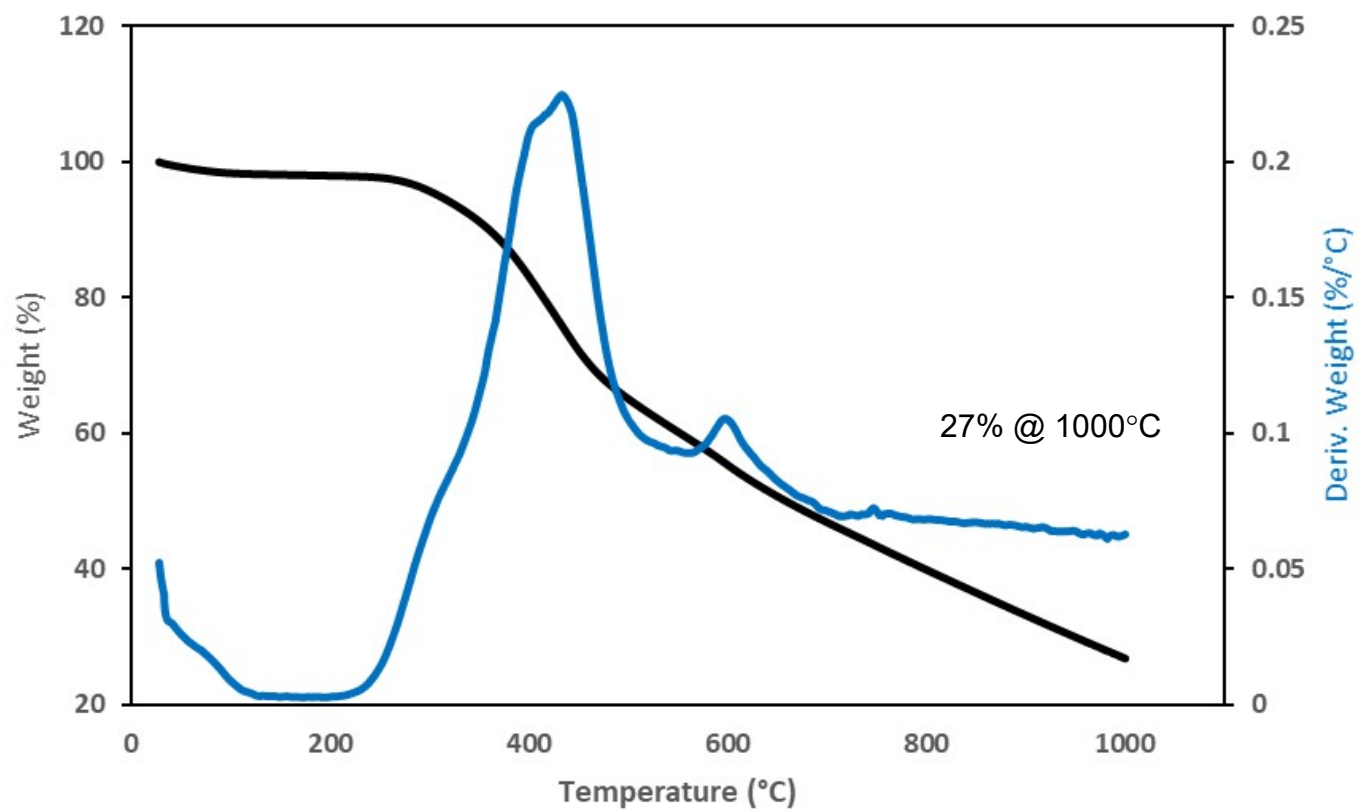



Figure S8. Differential scanning calorimetry trace for the 3:7 PD:CD mixture (exo = up)

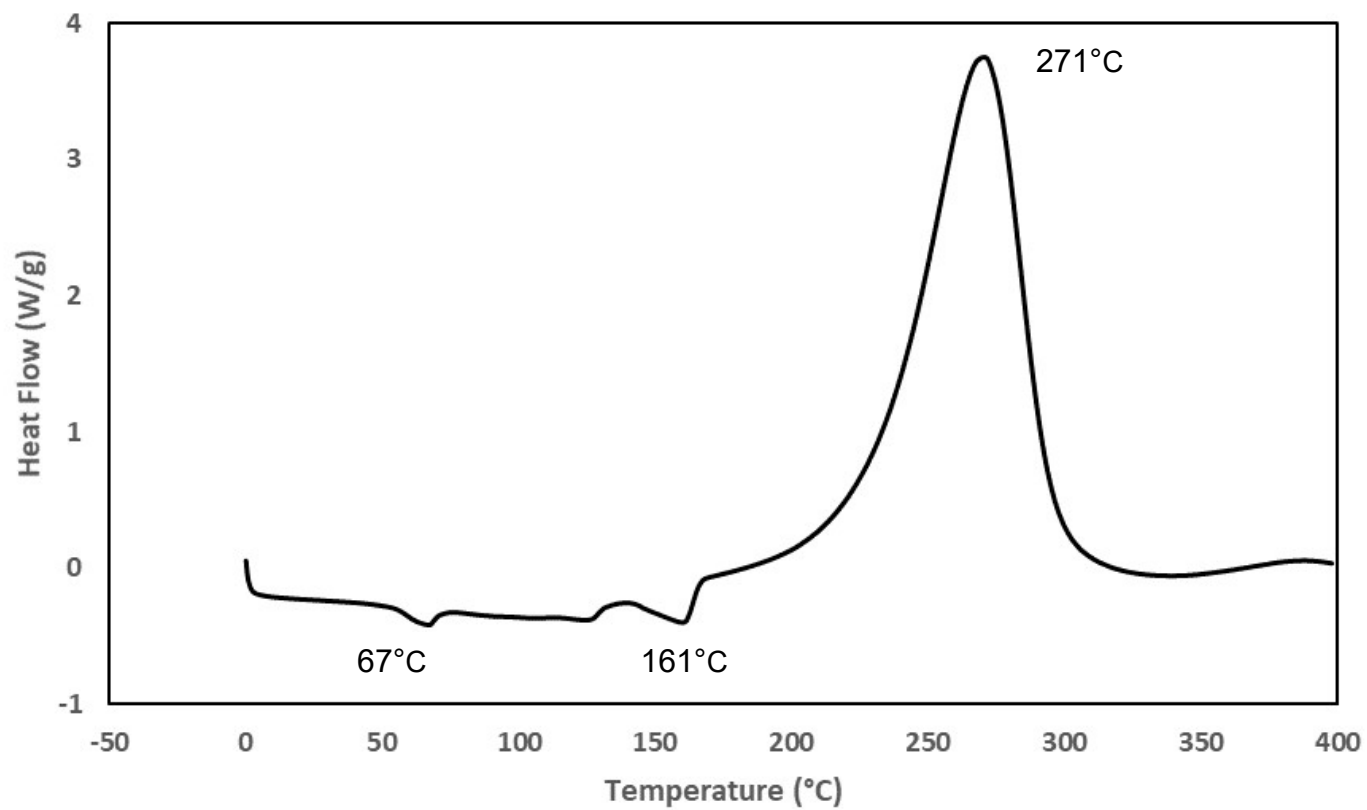

Figure S9. Differential scanning calorimetry trace for the 1:1 PD:CD mixture (exo = up)

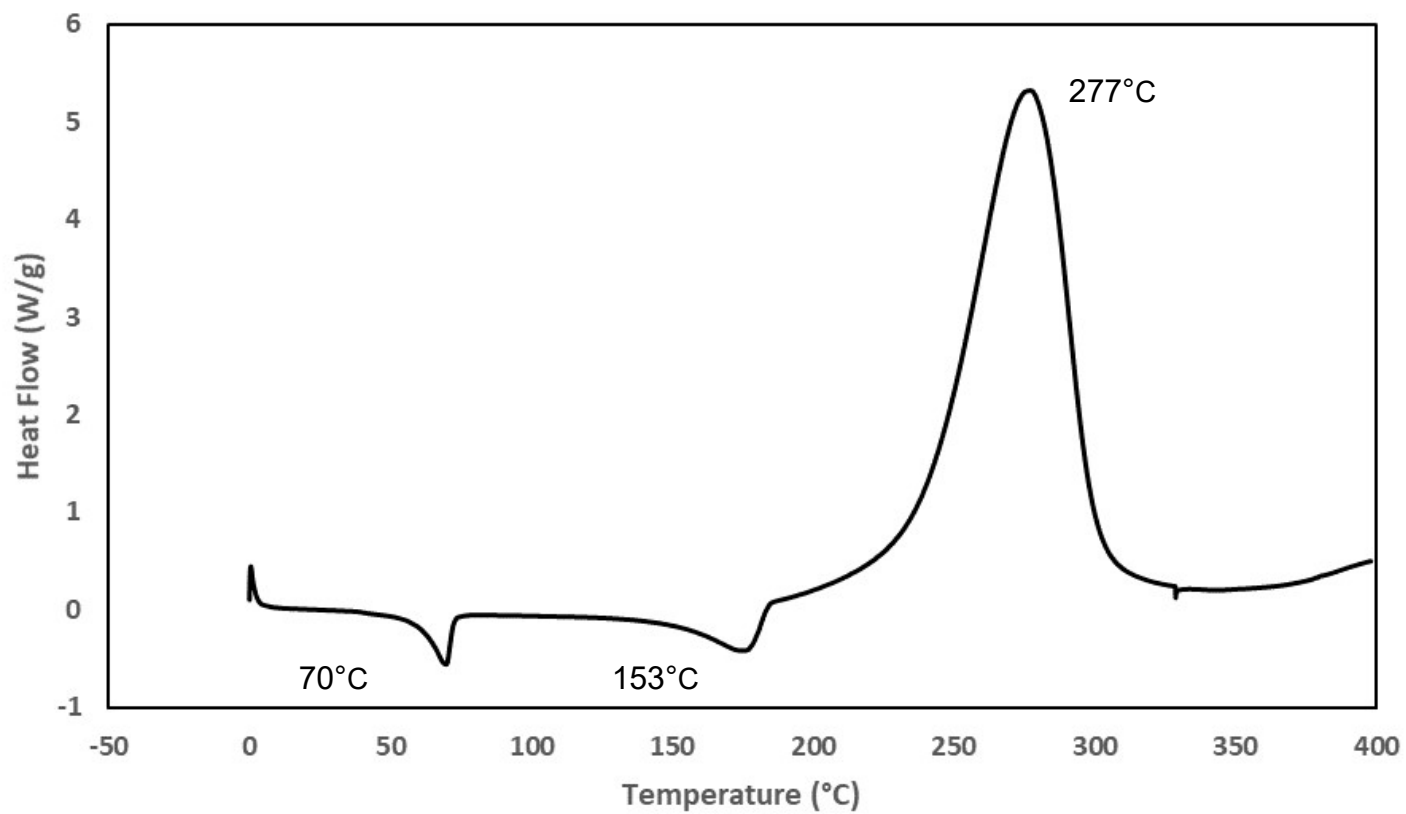

Figure S10. Differential scanning calorimetry trace for the 7:3 PD:CD mixture (exo = up)

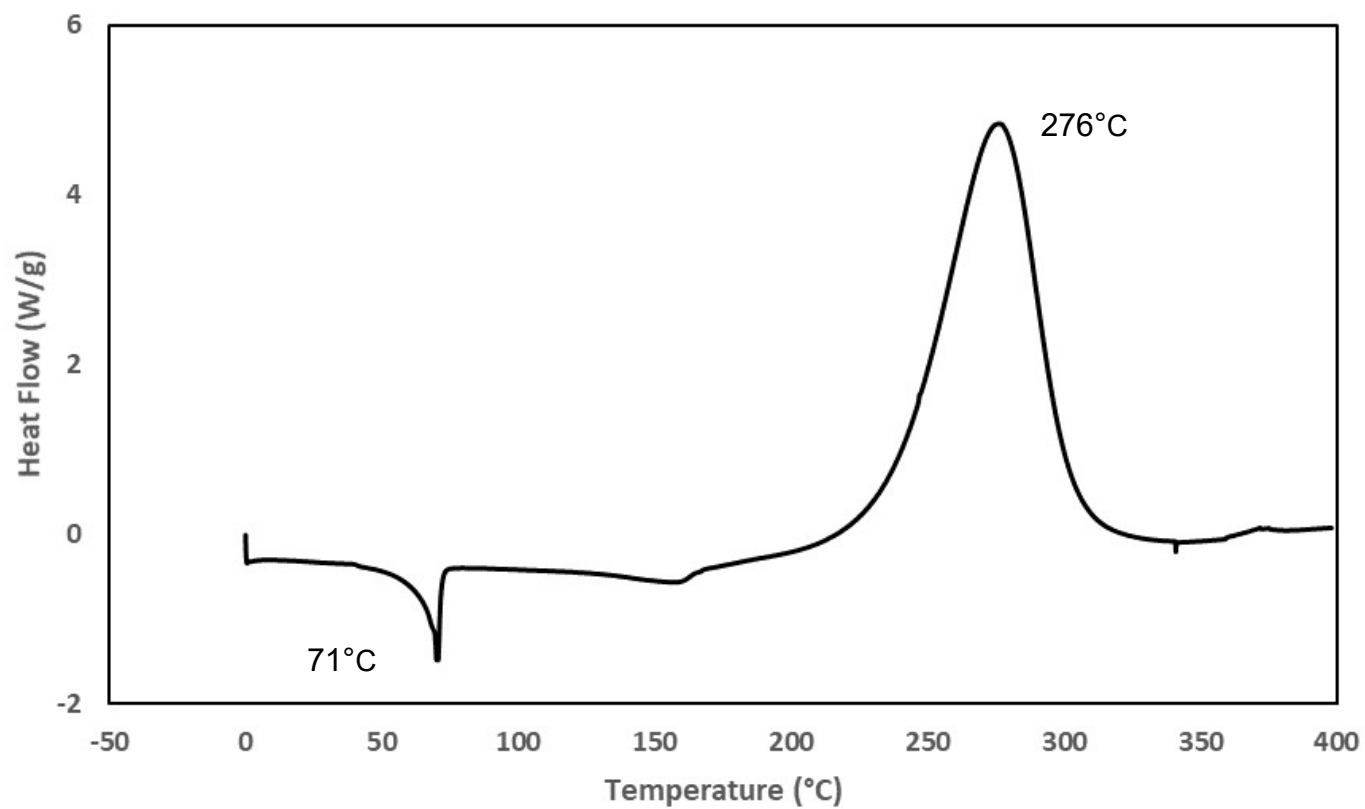

Figure S11. Thermogravimetric analysis of the cross-linked 7:3 PD:CD mixture

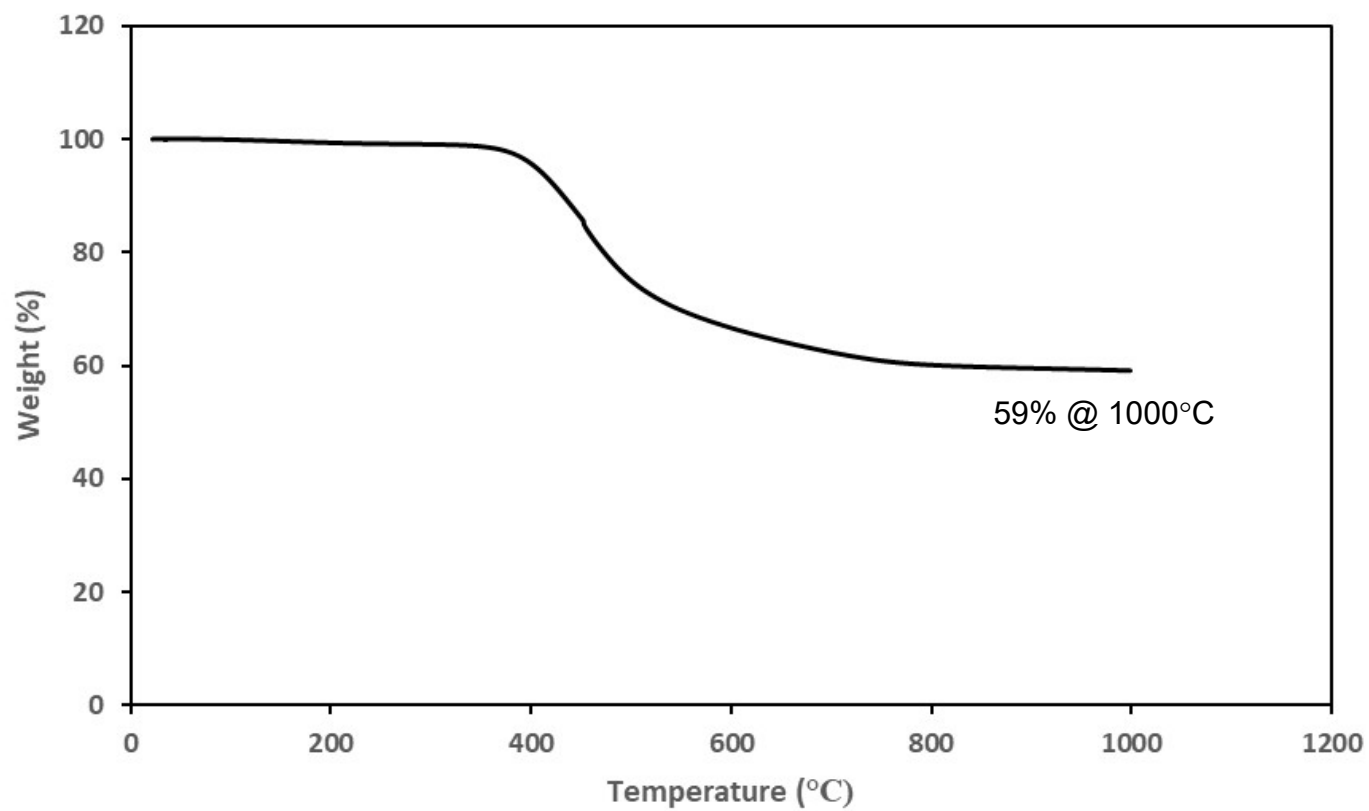

Figure S12. Thermomechanical analysis of a cross-linked 7:3 PD:CD mixture

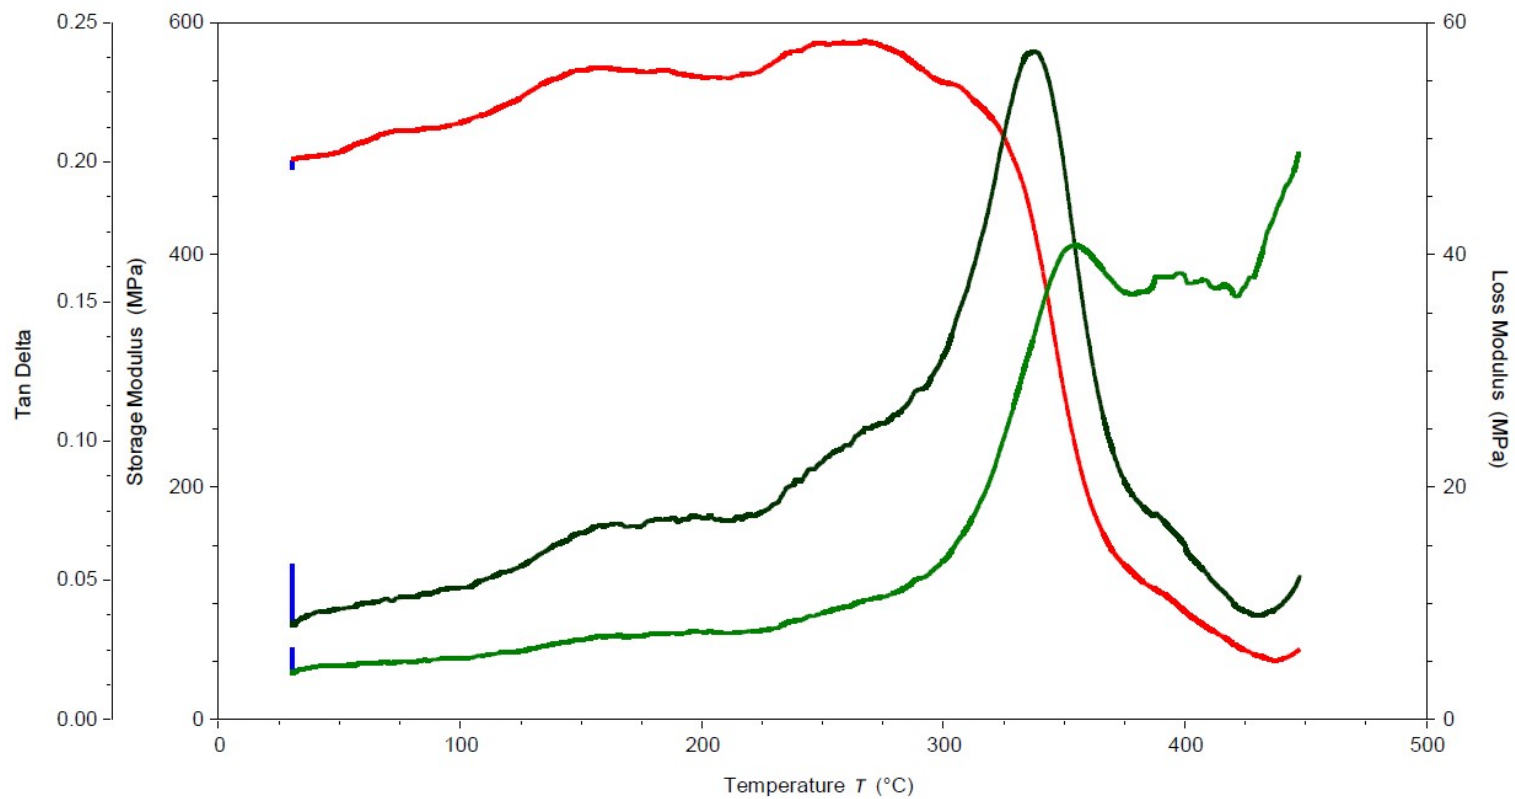

Figure S13. Differential scanning calorimetry trace of a 9:1 PD:CD mixture (exo = up)

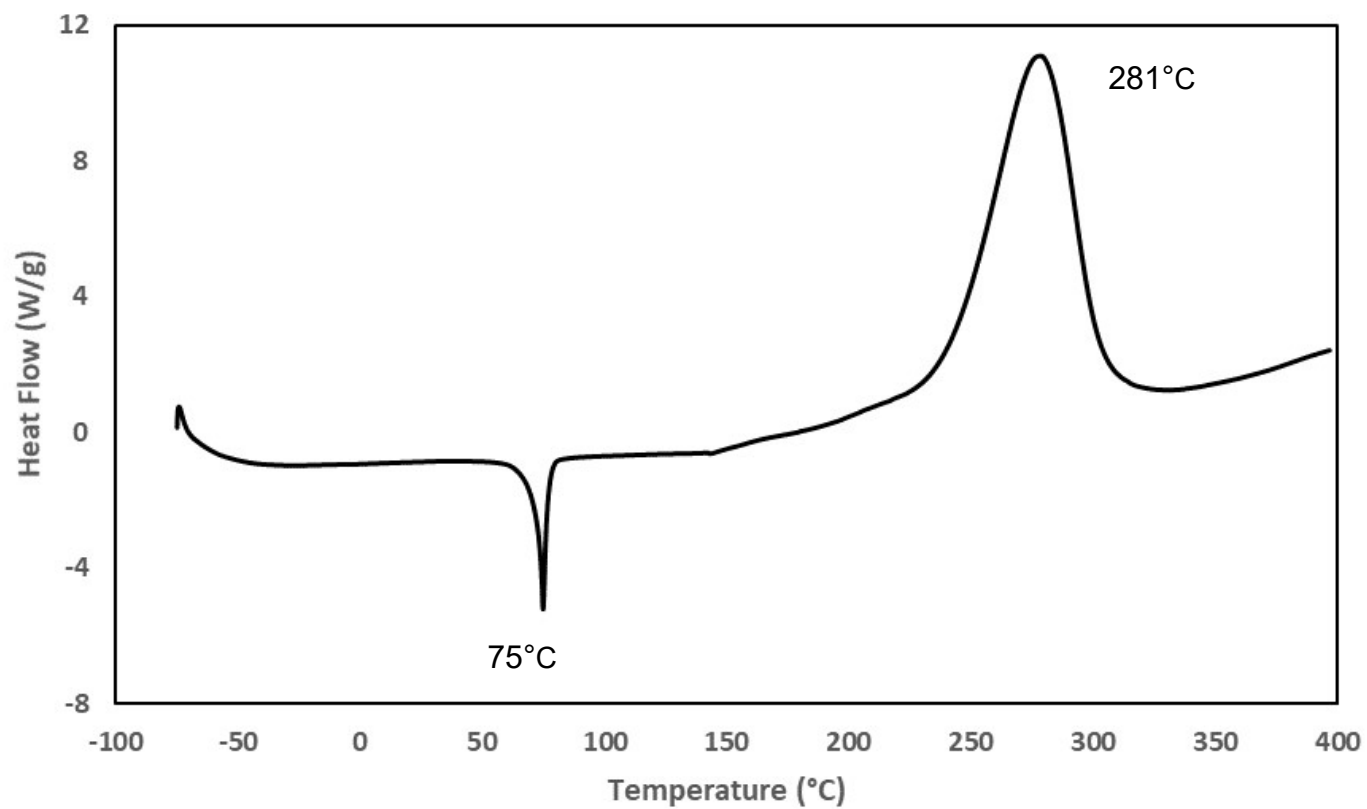

Figure S14. Differential scanning calorimetry trace for TD (exo = up)

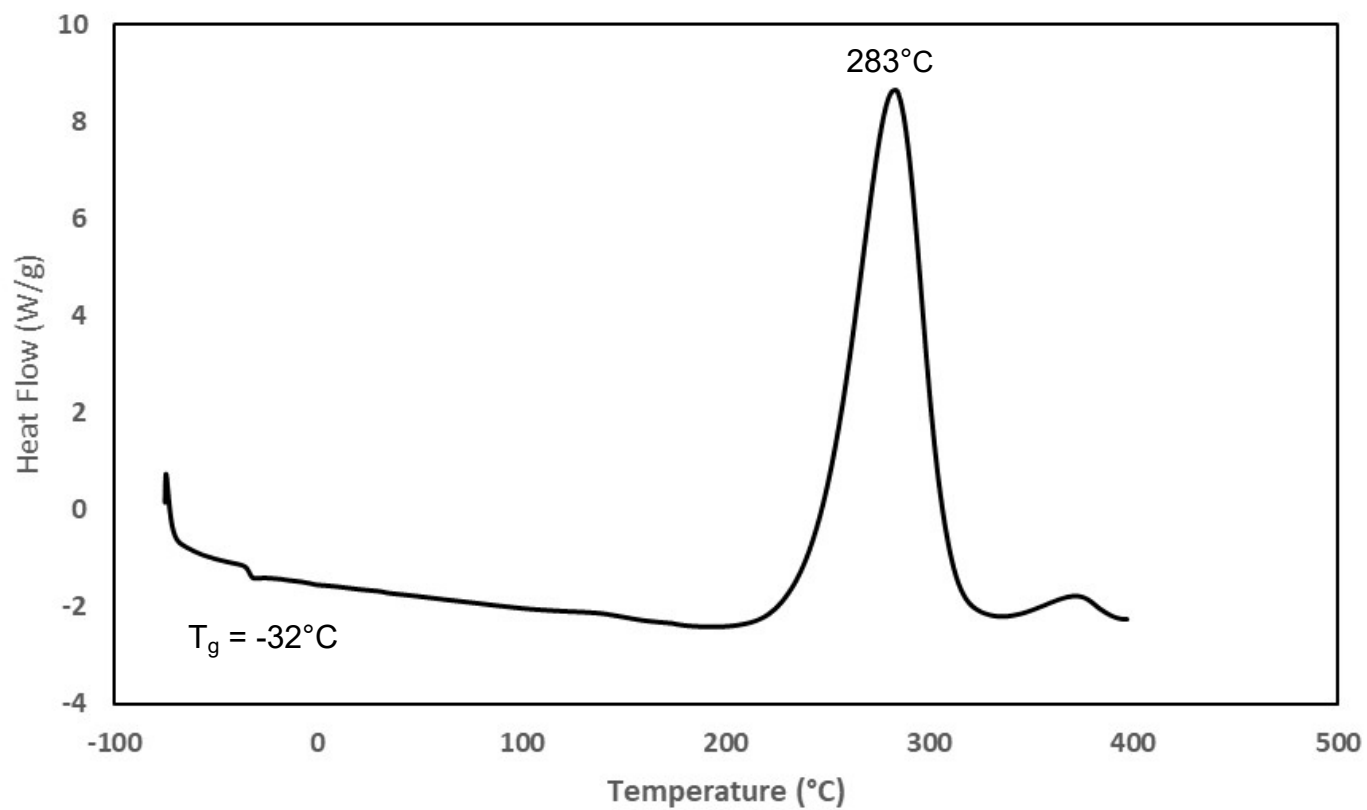

Figure S15. Thermogravimetric analysis of TD

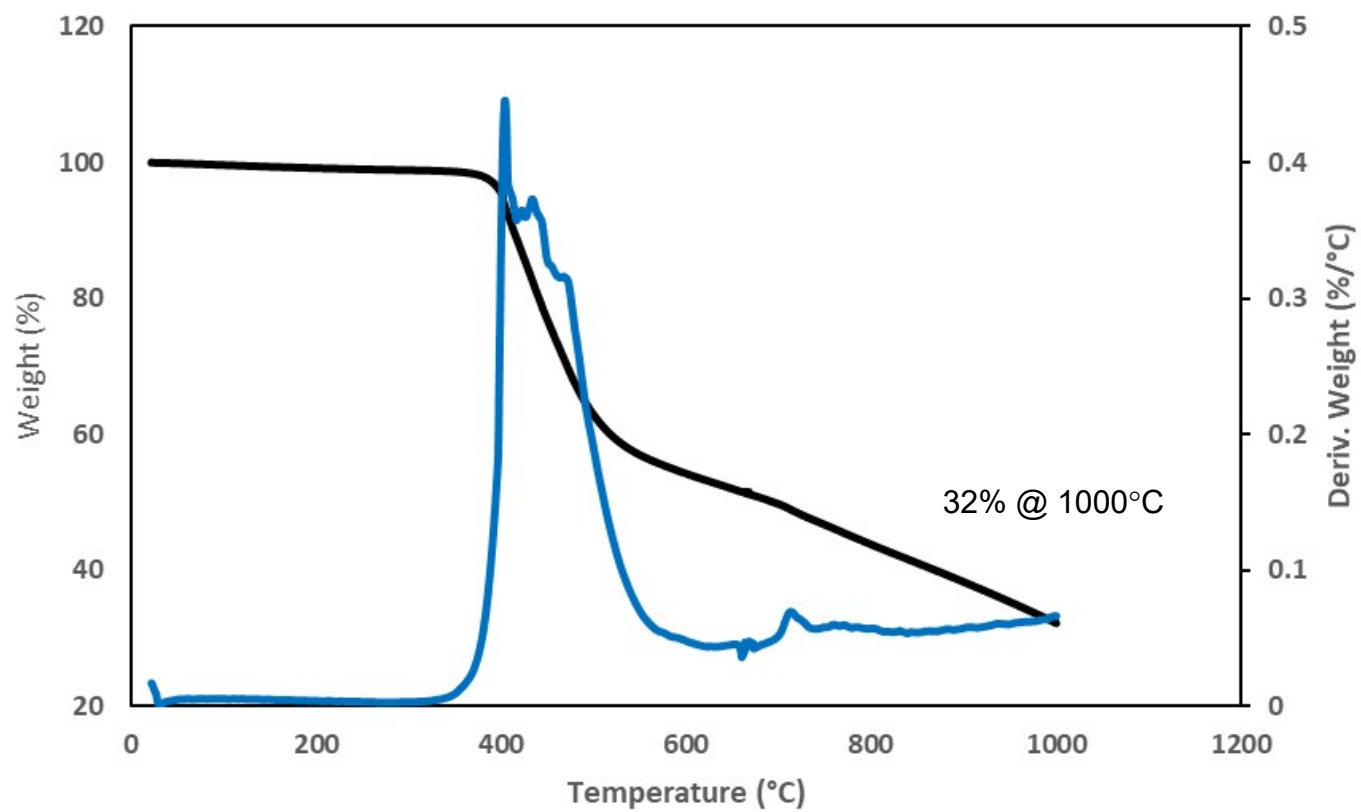



Figure S16. Thermomechanical analysis of TD

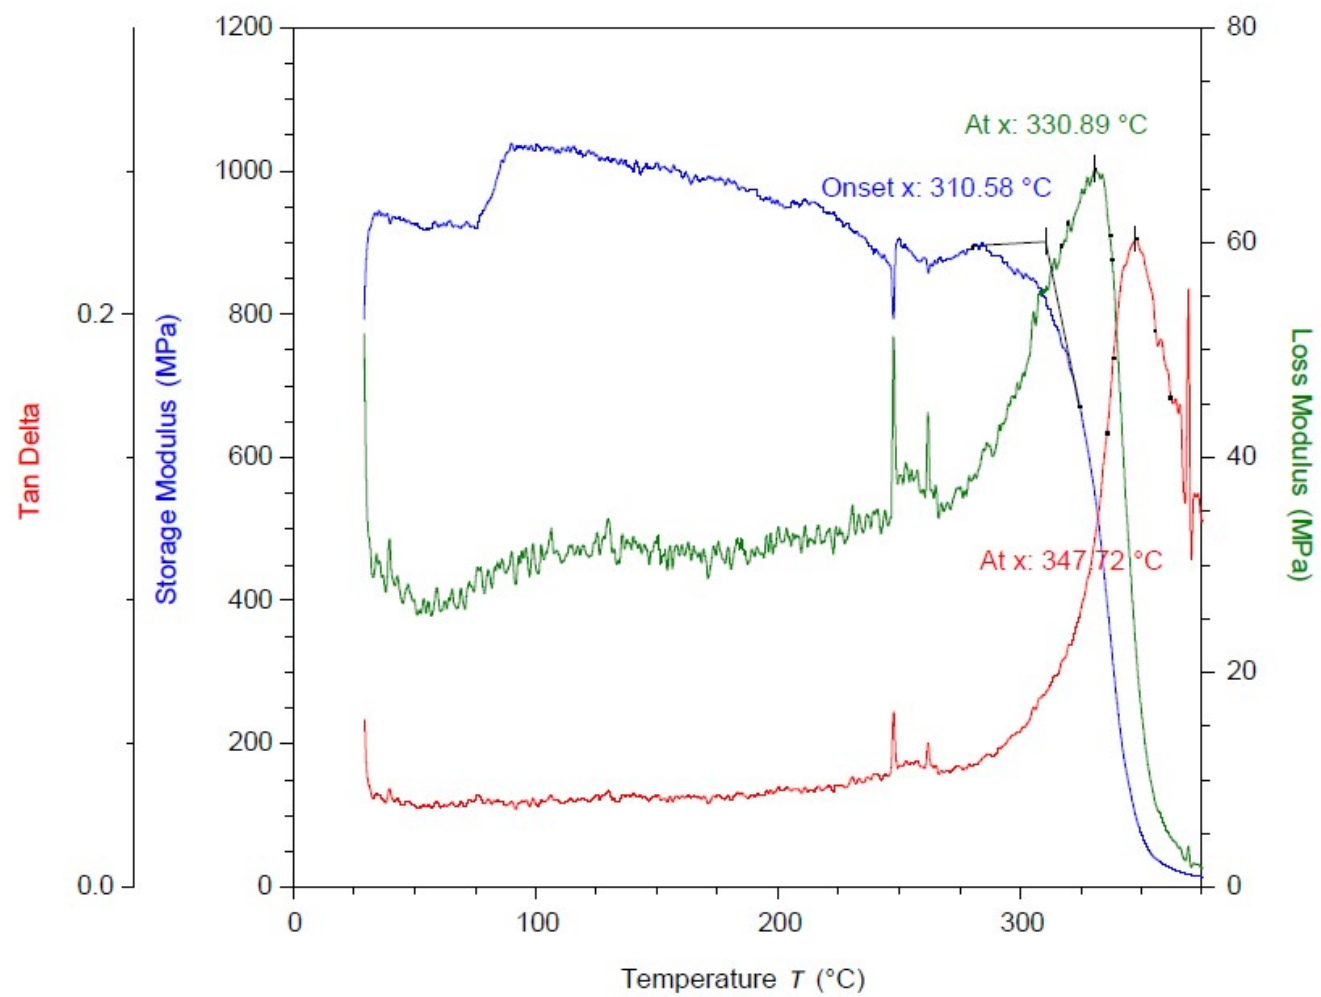

Figure S17. Differential scanning calorimetry trace for the 7:3 TD:CD mixture (exo = up)

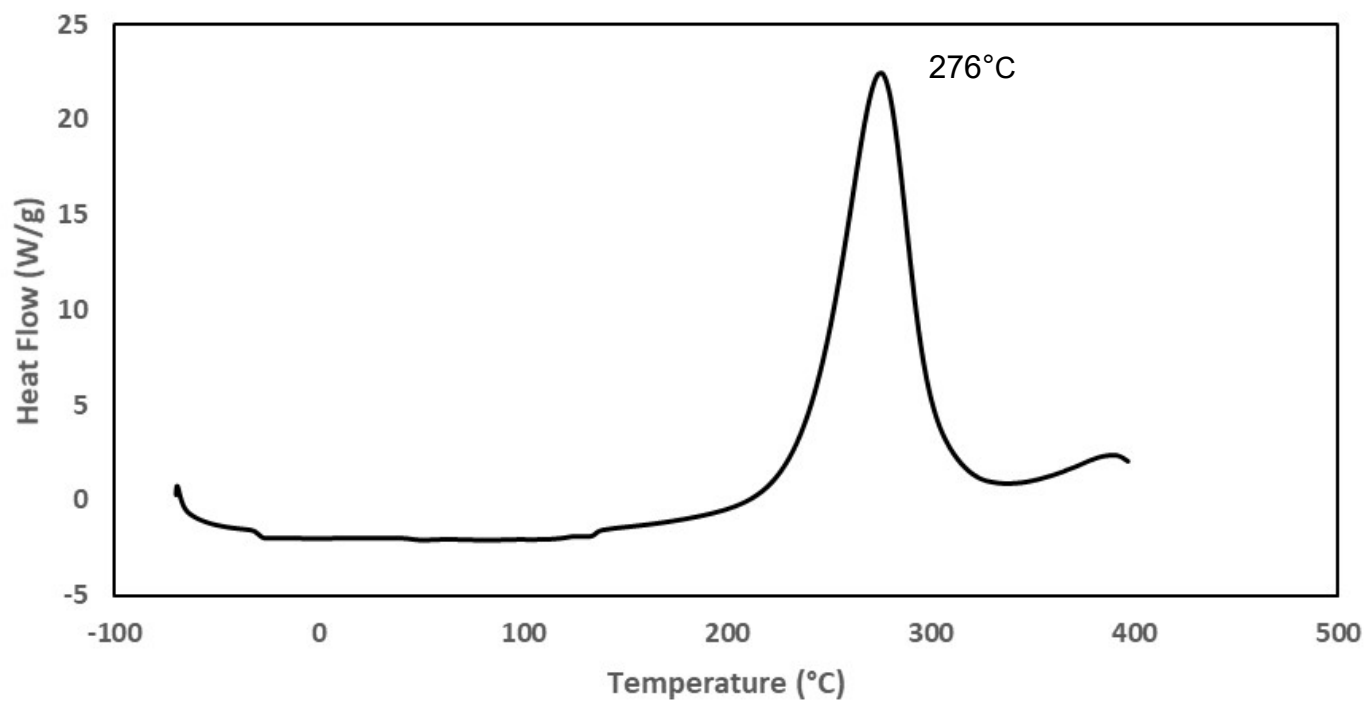

Figure S18. Thermogravimetric analysis of the cross-linked 7:3 TD:CD mixture

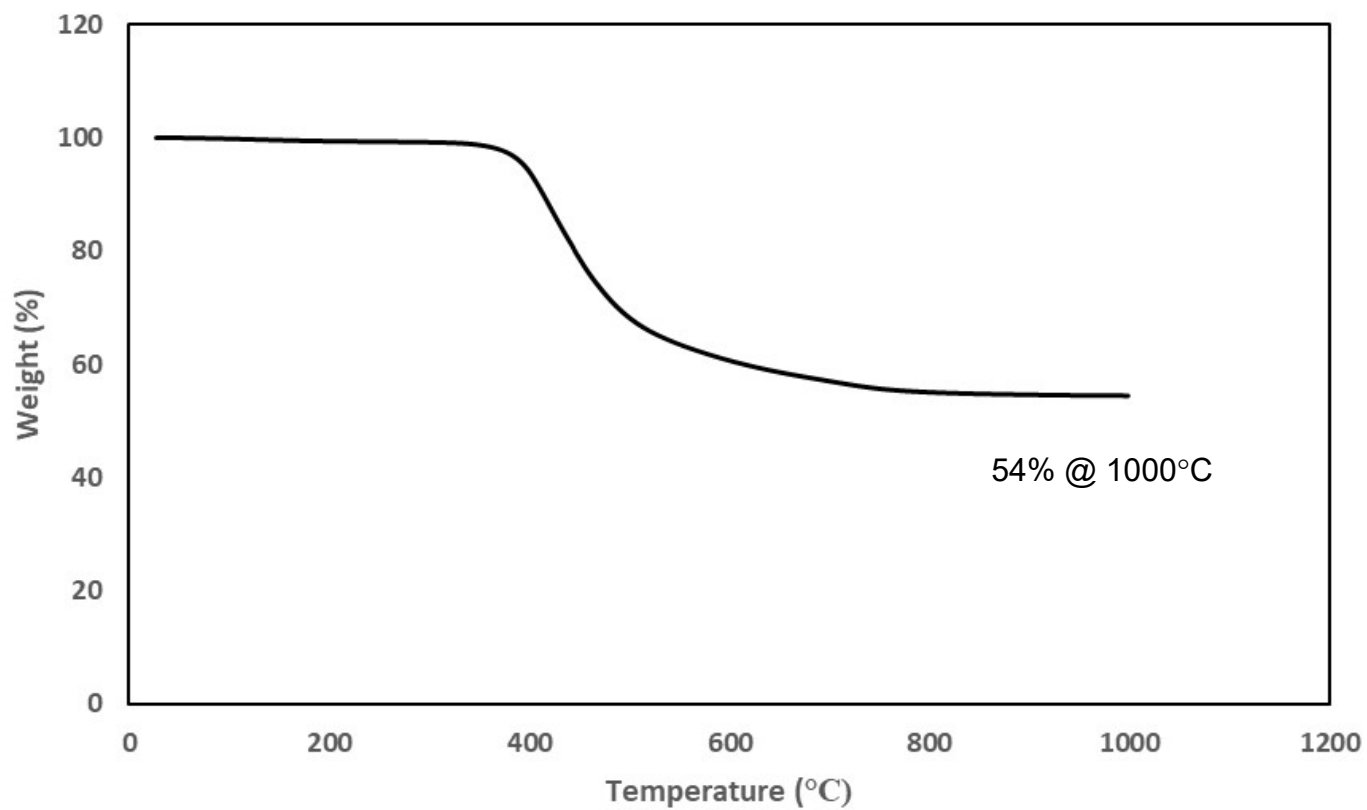

Figure S19. Thermomechanical analysis of the cross-linked 7:3 TD:CD mixture

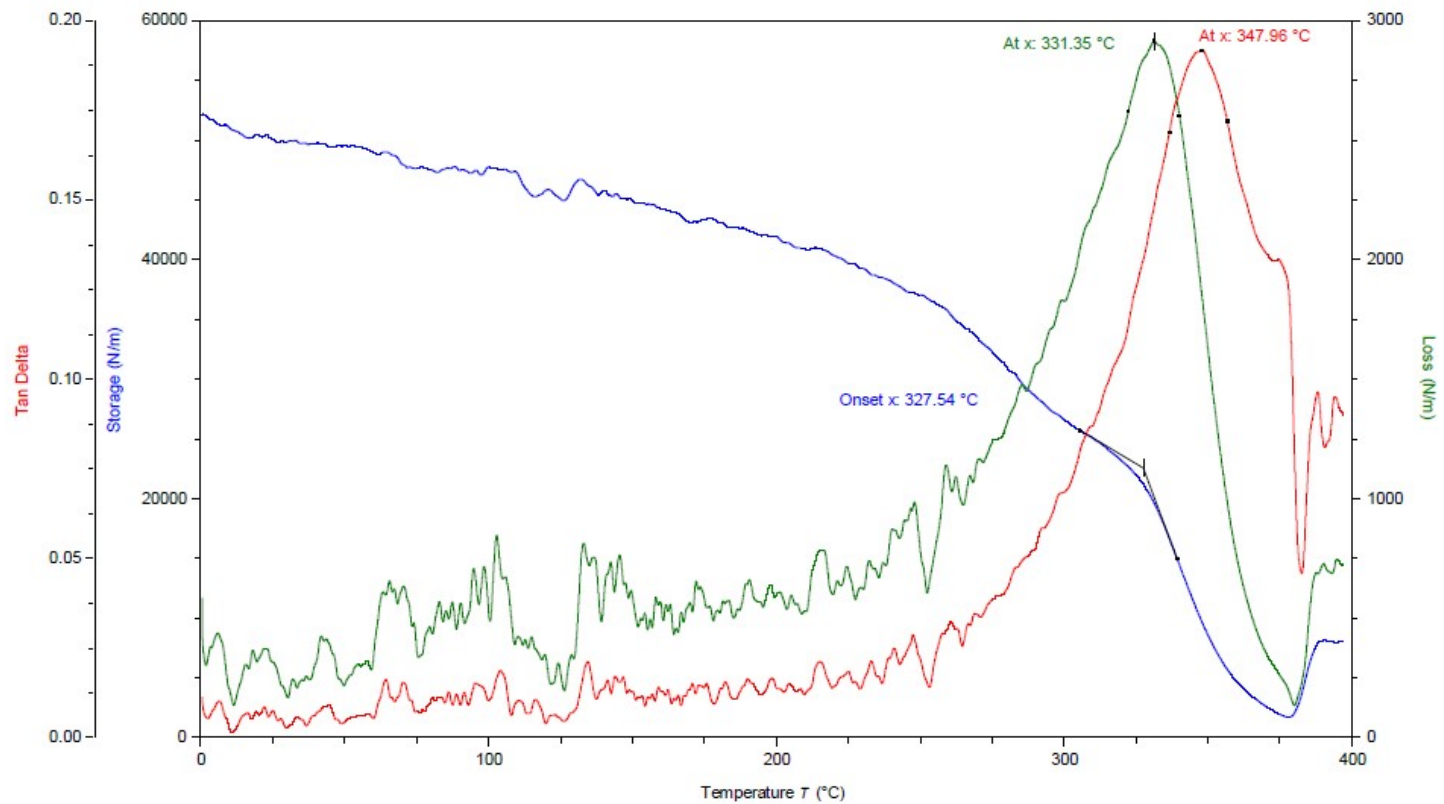

## Microscale Combustion Calorimetry Data

Figure S20. Microscale combustion calorimetry data for cross-linked CD

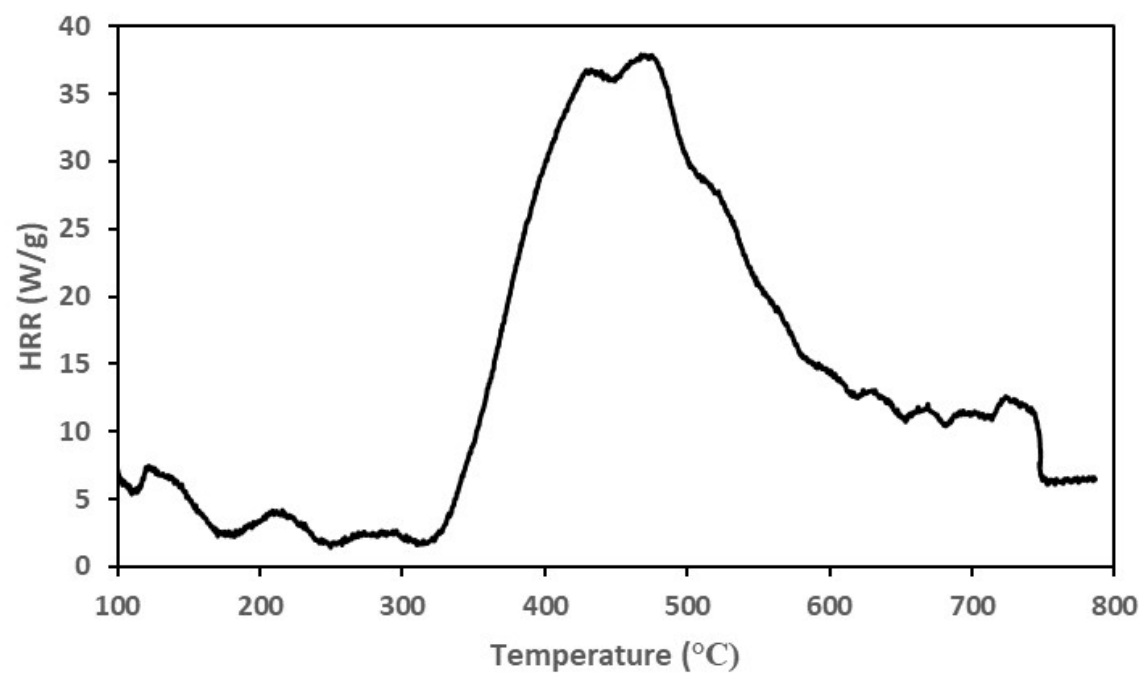

Figure S21. Microscale combustion calorimetry data for cross-linked FD

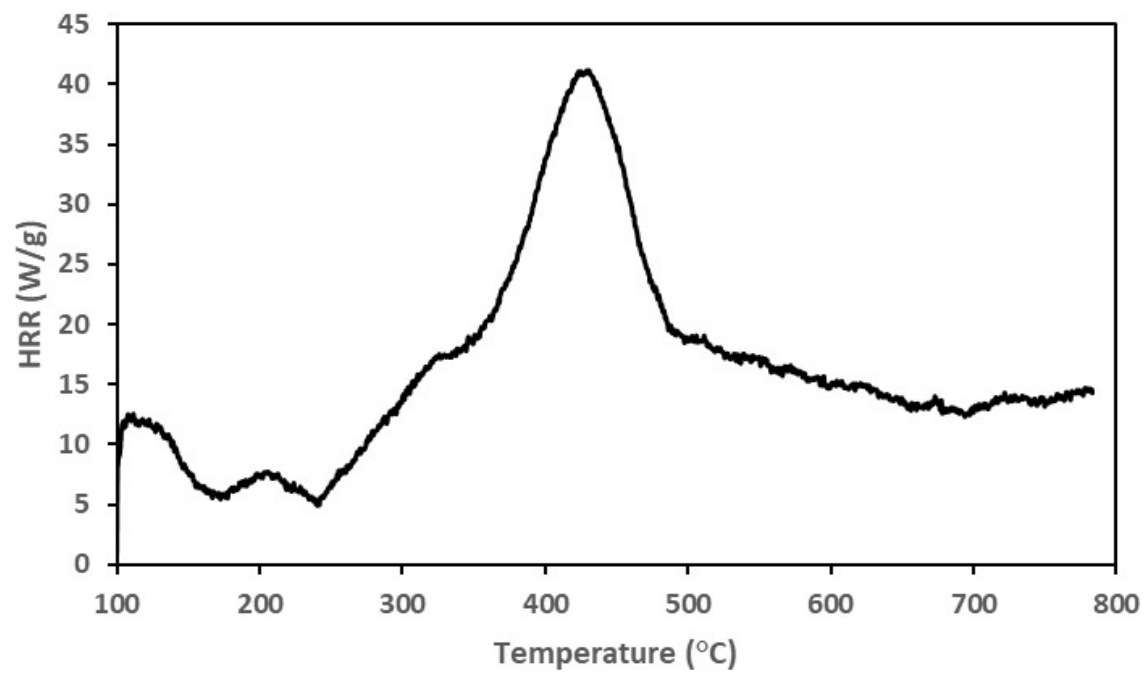

Figure S22. Microscale combustion calorimetry data for cross-linked SD

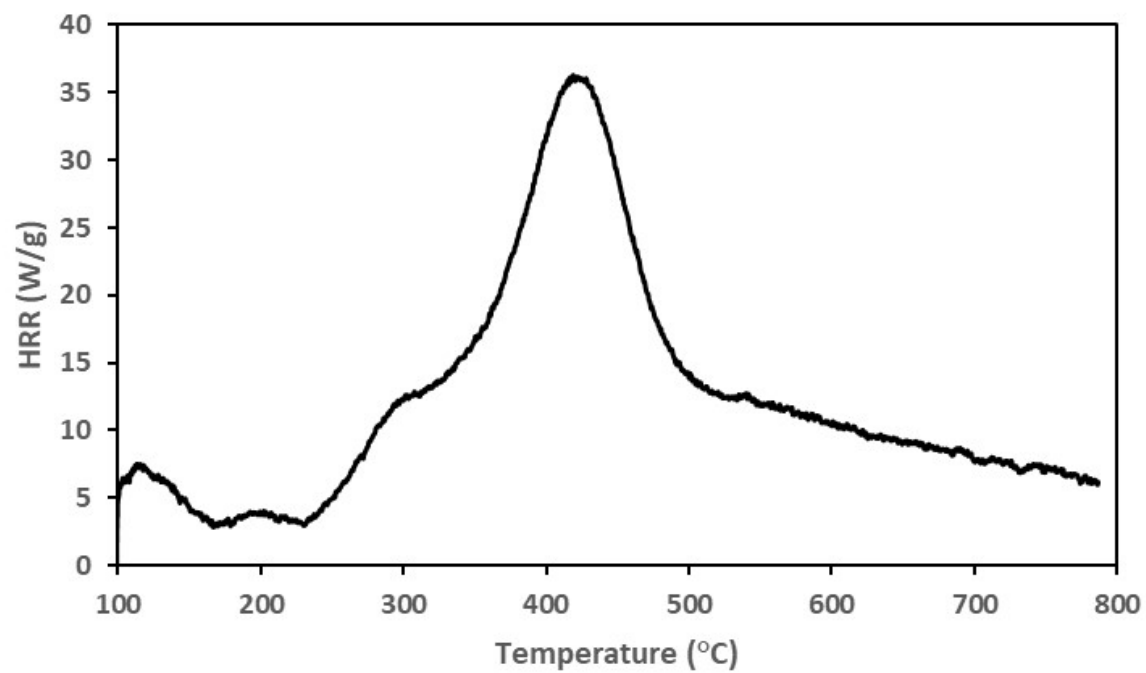

Figure S23. Microscale combustion calorimetry data for the cross-linked 7:3 PD:CD mixture

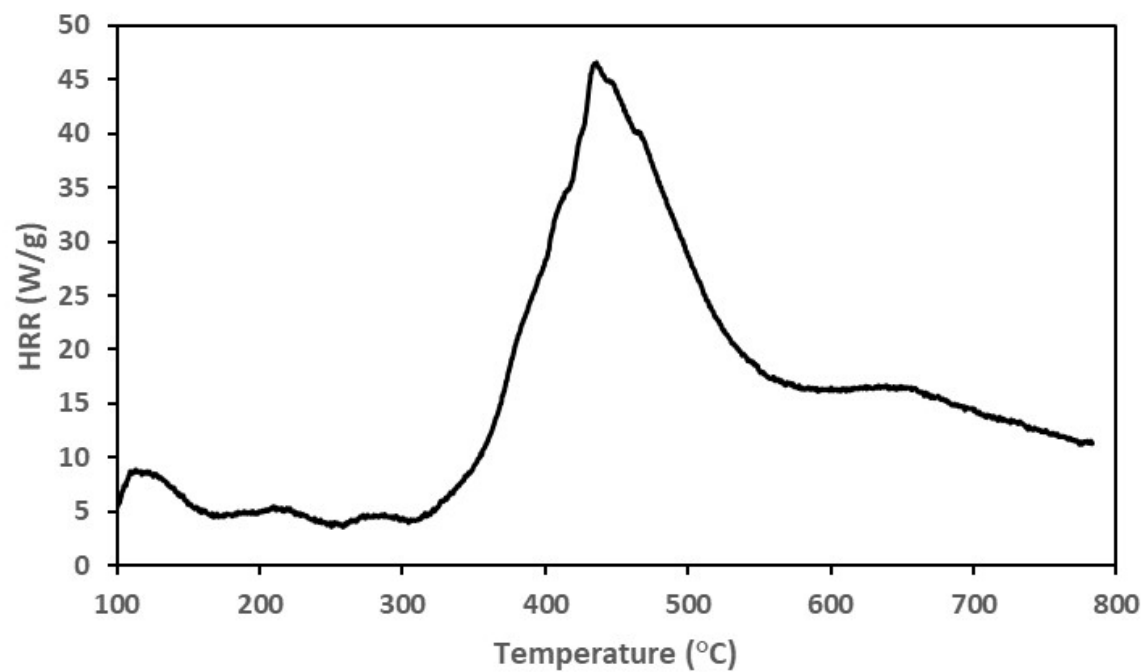



Figure S24. Microscale combustion calorimetry data for the cross-linked 9:1 PD:CD mixture

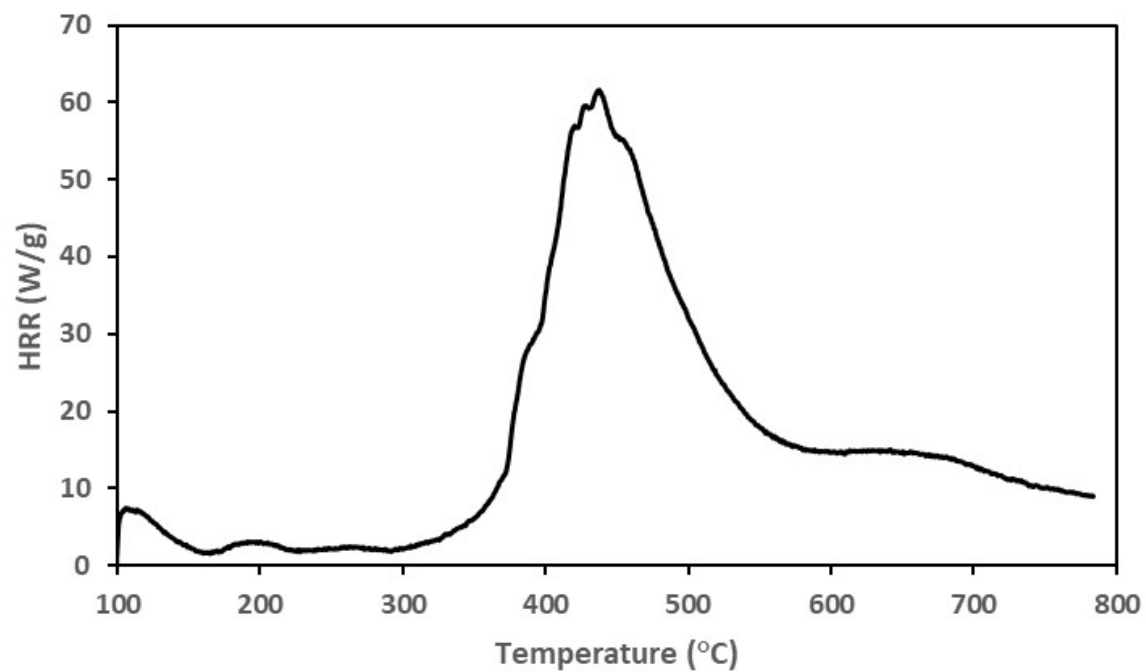

Figure S25. Microscale combustion calorimetry data for cross-linked TD

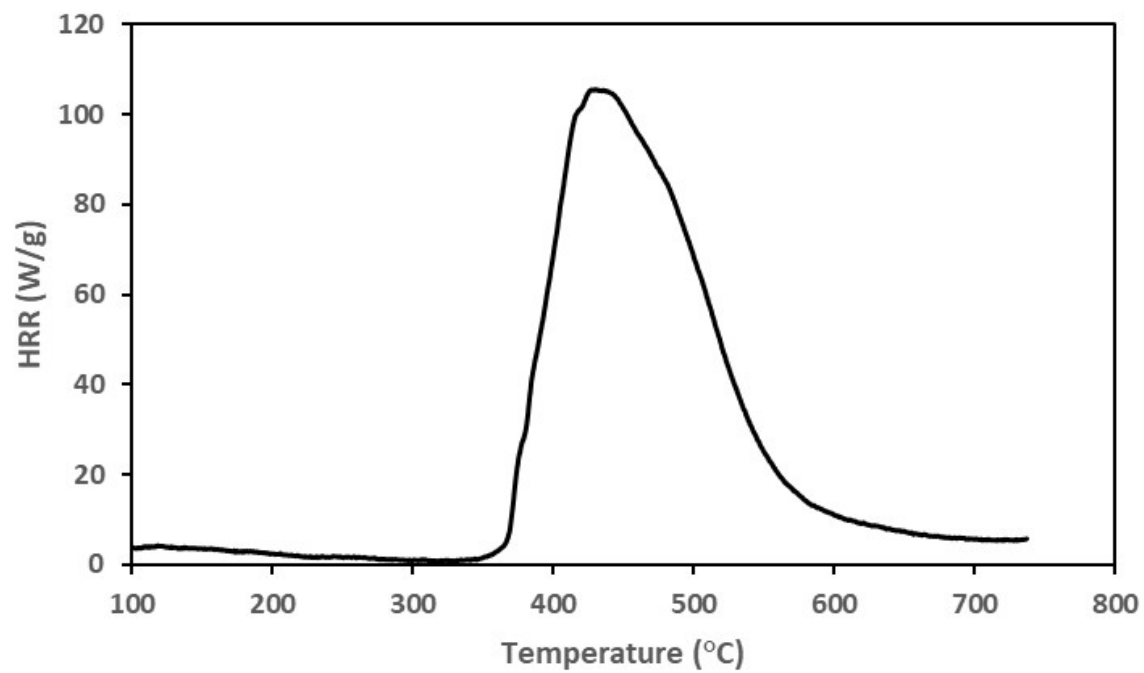

Figure S26. Microscale combustion calorimetry data for the cross-linked 70:30 TD:CD mixture

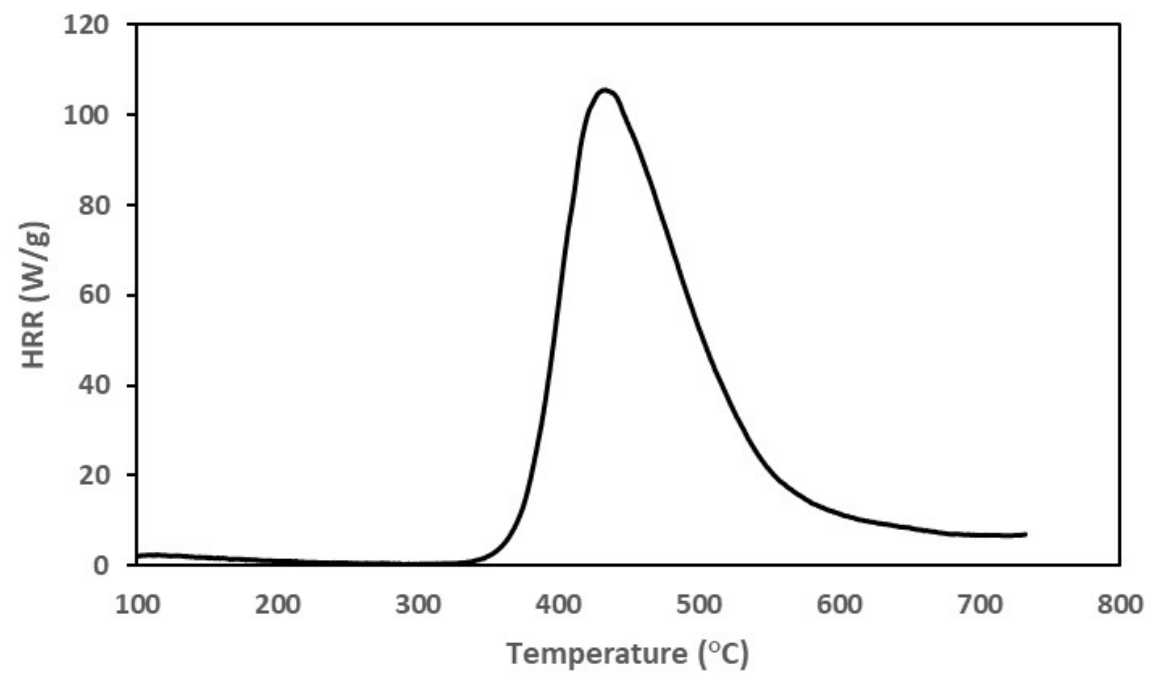

## Crystallographic Data

**Table S1. Crystal data and structure refinement for CD**

|                                             |                                                              |
|---------------------------------------------|--------------------------------------------------------------|
| Identification code                         | CD                                                           |
| Empirical formula                           | C <sub>20</sub> H <sub>16</sub> O <sub>2</sub>               |
| Formula weight                              | 288.349                                                      |
| Temperature/K                               | 100.0                                                        |
| Crystal system                              | orthorhombic                                                 |
| Space group                                 | Pbca                                                         |
| a/Å                                         | 7.4595(3)                                                    |
| b/Å                                         | 7.9946(3)                                                    |
| c/Å                                         | 25.5343(9)                                                   |
| α/°                                         | 90                                                           |
| β/°                                         | 90                                                           |
| γ/°                                         | 90                                                           |
| Volume/Å <sup>3</sup>                       | 1522.76(10)                                                  |
| Z                                           | 4                                                            |
| ρ <sub>calc</sub> /g/cm <sup>3</sup>        | 1.258                                                        |
| μ/mm <sup>-1</sup>                          | 0.635                                                        |
| F(000)                                      | 609.9                                                        |
| Crystal size/mm <sup>3</sup>                | 0.169 × 0.108 × 0.037                                        |
| Radiation                                   | Cu Kα (λ = 1.54178)                                          |
| 2θ range for data collection/°              | 6.92 to 108.46                                               |
| Index ranges                                | -7 ≤ h ≤ 7, -8 ≤ k ≤ 8, -26 ≤ l ≤ 25                         |
| Reflections collected                       | 6982                                                         |
| Independent reflections                     | 931 [R <sub>int</sub> = 0.0438, R <sub>sigma</sub> = 0.0288] |
| Data/restraints/parameters                  | 931/0/101                                                    |
| Goodness-of-fit on F <sup>2</sup>           | 1.076                                                        |
| Final R indexes [I ≥ 2σ (I)]                | R <sub>1</sub> = 0.0415, wR <sub>2</sub> = 0.0877            |
| Final R indexes [all data]                  | R <sub>1</sub> = 0.0467, wR <sub>2</sub> = 0.0902            |
| Largest diff. peak/hole / e Å <sup>-3</sup> | 0.19/-0.16                                                   |

**Table S2. Fractional Atomic Coordinates ( $\times 10^4$ ) and Equivalent Isotropic Displacement Parameters ( $\text{\AA}^2 \times 10^3$ ) for Compound 1**  
 $U_{\text{eq}}$  is defined as 1/3 of the trace of the orthogonalised  $U_{ij}$  tensor.

| Atom   | x          | y          | z          | U(eq)   |
|--------|------------|------------|------------|---------|
| O(001) | 4998.8(18) | 5702.4(16) | 3416.8(5)  | 26.8(4) |
| C(002) | 4991(3)    | 4409(2)    | 3772.2(8)  | 23.3(6) |
| C(003) | 5804(3)    | 4459(3)    | 4261.1(8)  | 25.3(6) |
| C(004) | 4743(3)    | 1641(2)    | 4441.9(8)  | 24.8(6) |
| C(005) | 4058(3)    | 2988(2)    | 3617.3(8)  | 26.4(6) |
| C(006) | 4577(3)    | 144(3)     | 4776.2(8)  | 28.6(6) |
| C(007) | 6018(3)    | 7153(2)    | 3553.3(8)  | 28.0(6) |
| C(008) | 3954(3)    | 1636(3)    | 3949.2(8)  | 27.1(6) |
| C(009) | 5670(3)    | 3084(2)    | 4589.3(8)  | 26.9(6) |
| C(00A) | 5842(3)    | 8351(3)    | 3125.9(9)  | 32.0(6) |
| C(00B) | 5691(4)    | 9348(3)    | 2788.6(10) | 43.4(7) |

**Table S3. Anisotropic Displacement Parameters ( $\text{\AA}^2 \times 10^3$ ) for Compound 1. The Anisotropic displacement factor exponent takes the form:  $-2\pi^2[h^2a^*U_{11}+2hka^*b^*U_{12}+\dots]$ .**

| Atom   | $U_{11}$ | $U_{22}$ | $U_{33}$ | $U_{12}$ | $U_{13}$ | $U_{23}$ |
|--------|----------|----------|----------|----------|----------|----------|
| O(001) | 31.9(9)  | 20.6(8)  | 28.0(9)  | -3.0(7)  | -2.2(7)  | 1.0(7)   |
| C(002) | 24.1(13) | 19.3(12) | 26.6(13) | 4.4(10)  | 4.1(10)  | 1.5(10)  |
| C(003) | 26.1(12) | 21.7(13) | 28.3(13) | -1.0(10) | 1.1(10)  | -3.0(9)  |
| C(004) | 24.4(12) | 20.2(12) | 29.9(13) | 1.9(10)  | 5.4(10)  | 0.1(10)  |
| C(005) | 24.5(13) | 24.1(13) | 30.4(13) | 0.6(10)  | -2.6(10) | -1.9(10) |
| C(006) | 28.0(13) | 24.6(12) | 33.1(13) | -1.2(10) | 3.8(10)  | -3.5(11) |
| C(007) | 34.6(14) | 20.7(12) | 28.6(13) | -5.5(10) | 0.4(10)  | -0.9(10) |
| C(008) | 23.1(13) | 21.9(12) | 36.3(14) | -2.4(10) | 0.9(10)  | -3.9(10) |
| C(009) | 27.3(13) | 29.6(13) | 23.8(12) | 3.9(11)  | 1.1(10)  | -0.5(10) |
| C(00A) | 39.8(15) | 25.4(13) | 30.7(13) | -1.5(11) | 2.2(11)  | -2.7(12) |
| C(00B) | 64.5(19) | 31.1(14) | 34.6(15) | 0.0(13)  | 2.0(13)  | 3.1(12)  |

**Table S4. Bond Lengths for Compound 1.**

| Atom   | Atom   | Length/Å | Atom   | Atom                | Length/Å |
|--------|--------|----------|--------|---------------------|----------|
| O(001) | C(002) | 1.376(2) | C(004) | C(008)              | 1.389(3) |
| O(001) | C(007) | 1.430(2) | C(004) | C(009)              | 1.396(3) |
| C(002) | C(003) | 1.388(3) | C(005) | C(008)              | 1.376(3) |
| C(002) | C(005) | 1.389(3) | C(006) | C(006) <sup>1</sup> | 1.325(4) |
| C(003) | C(009) | 1.386(3) | C(007) | C(00A)              | 1.458(3) |
| C(004) | C(006) | 1.476(3) | C(00A) | C(00B)              | 1.179(3) |

<sup>1</sup>1-X,-Y,1-Z**Table S5. Bond Angles for Compound 1.**

| Atom   | Atom   | Atom   | Angle/°    | Atom                | Atom   | Atom   | Angle/°    |
|--------|--------|--------|------------|---------------------|--------|--------|------------|
| C(007) | O(001) | C(002) | 116.81(15) | C(009)              | C(004) | C(008) | 117.17(19) |
| C(003) | C(002) | O(001) | 124.71(18) | C(008)              | C(005) | C(002) | 119.67(19) |
| C(005) | C(002) | O(001) | 115.37(17) | C(006) <sup>1</sup> | C(006) | C(004) | 126.8(3)   |
| C(005) | C(002) | C(003) | 119.91(19) | C(00A)              | C(007) | O(001) | 107.63(17) |
| C(009) | C(003) | C(002) | 119.28(19) | C(005)              | C(008) | C(004) | 122.1(2)   |
| C(008) | C(004) | C(006) | 119.06(19) | C(004)              | C(009) | C(003) | 121.86(19) |
| C(009) | C(004) | C(006) | 123.76(19) | C(00B)              | C(00A) | C(007) | 178.5(2)   |

<sup>1</sup>1-X,-Y,1-Z**Table S6. Hydrogen Atom Coordinates (Å×10<sup>4</sup>) and Isotropic Displacement Parameters (Å<sup>2</sup>×10<sup>3</sup>) for Compound 1.**

| Atom   | x       | y       | z         | U(eq)   |
|--------|---------|---------|-----------|---------|
| H(003) | 6444(3) | 5426(3) | 4369.6(8) | 30.4(7) |
| H(005) | 3494(3) | 2951(2) | 3283.8(8) | 31.6(7) |
| H(006) | 3781(3) | -704(3) | 4658.1(8) | 34.3(7) |
| H(00a) | 5559(3) | 7644(2) | 3883.0(8) | 33.6(7) |
| H(00b) | 7293(3) | 6851(2) | 3604.3(8) | 33.6(7) |
| H(008) | 3322(3) | 667(3)  | 3837.8(8) | 32.5(7) |

**Table S6. Hydrogen Atom Coordinates ( $\text{\AA} \times 10^4$ ) and Isotropic Displacement Parameters ( $\text{\AA}^2 \times 10^3$ ) for Compound 1.**

| Atom   | x       | y        | z          | U(eq)   |
|--------|---------|----------|------------|---------|
| H(009) | 6224(3) | 3124(2)  | 4924.0(8)  | 32.3(7) |
| H(00c) | 5569(4) | 10152(3) | 2516.8(10) | 52.1(9) |

**Figure S27. X-ray structure of CD showing staggered  $\pi$ -stacking of aryl rings**

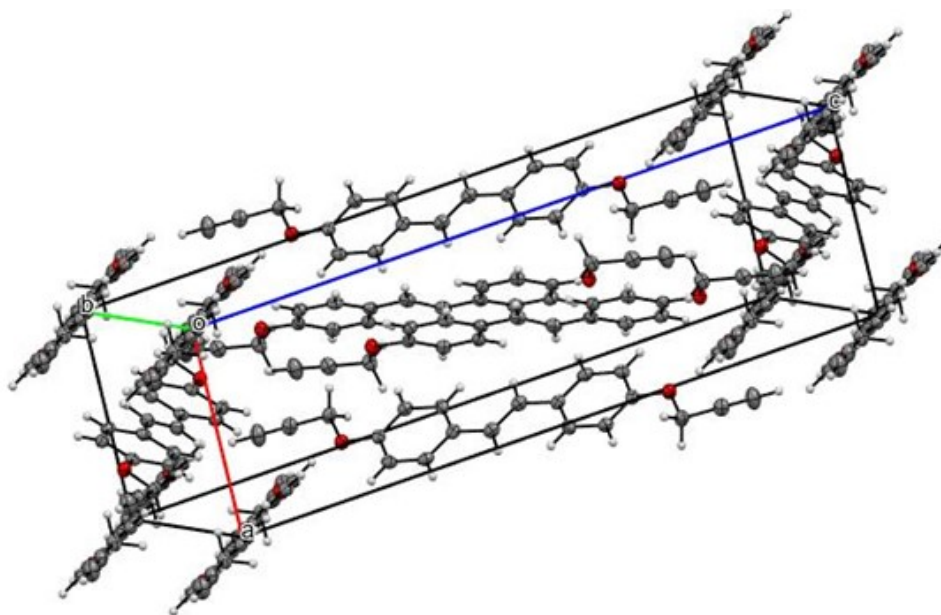

## IR Spectra of Cured Thermosets and Monomers

**Figure S28.**  
**FTIR**  
**FD (red) and**  
**FD (green)**

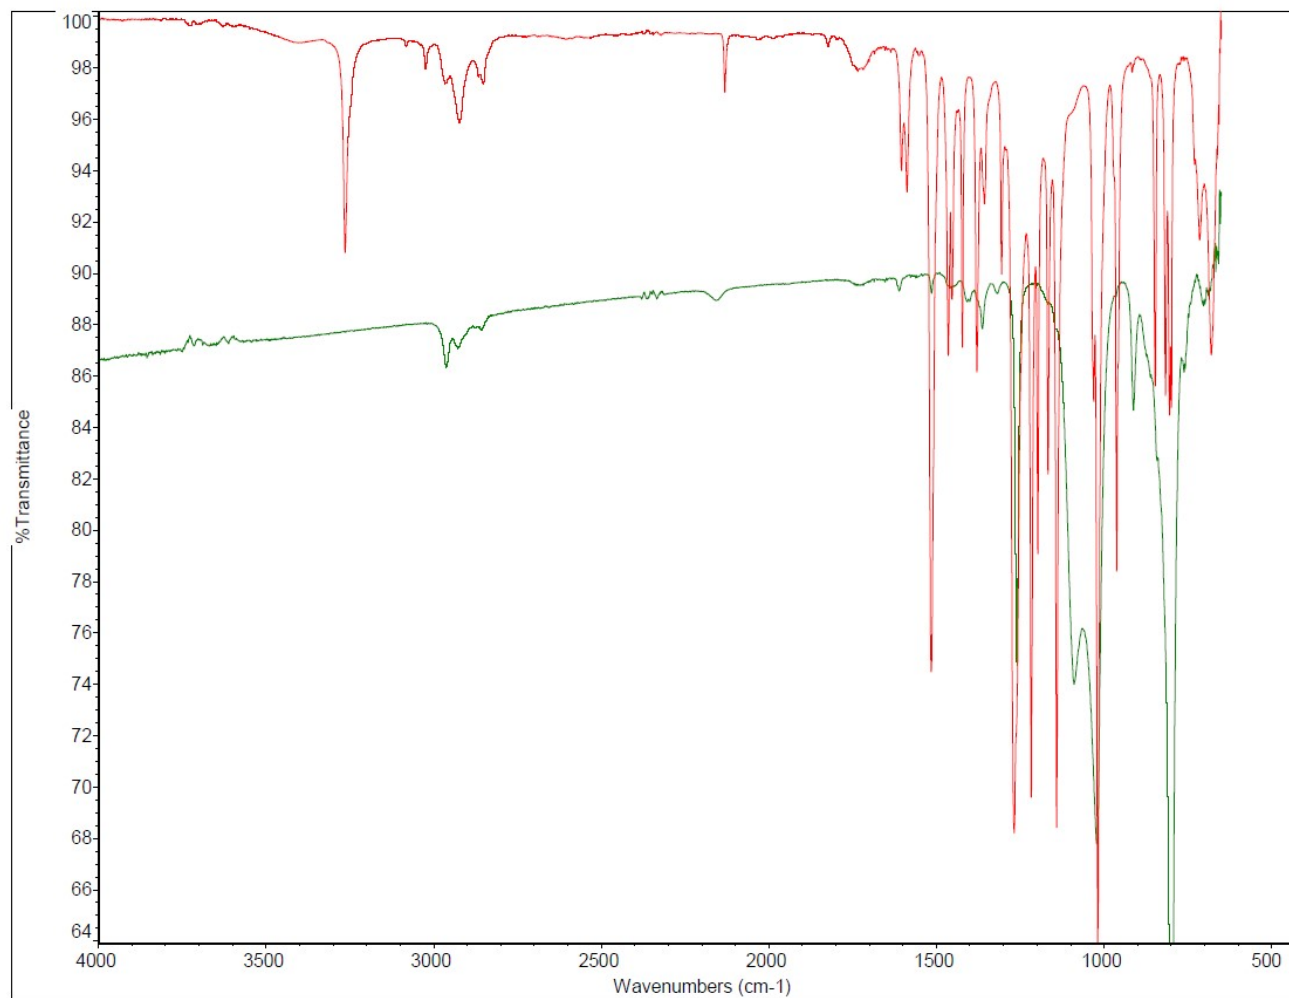

**Stacked**  
**spectra of**  
**cross-linked**



**Figure S29. Stacked FTIR spectra of SD (red) and cross-linked SD (blue)**

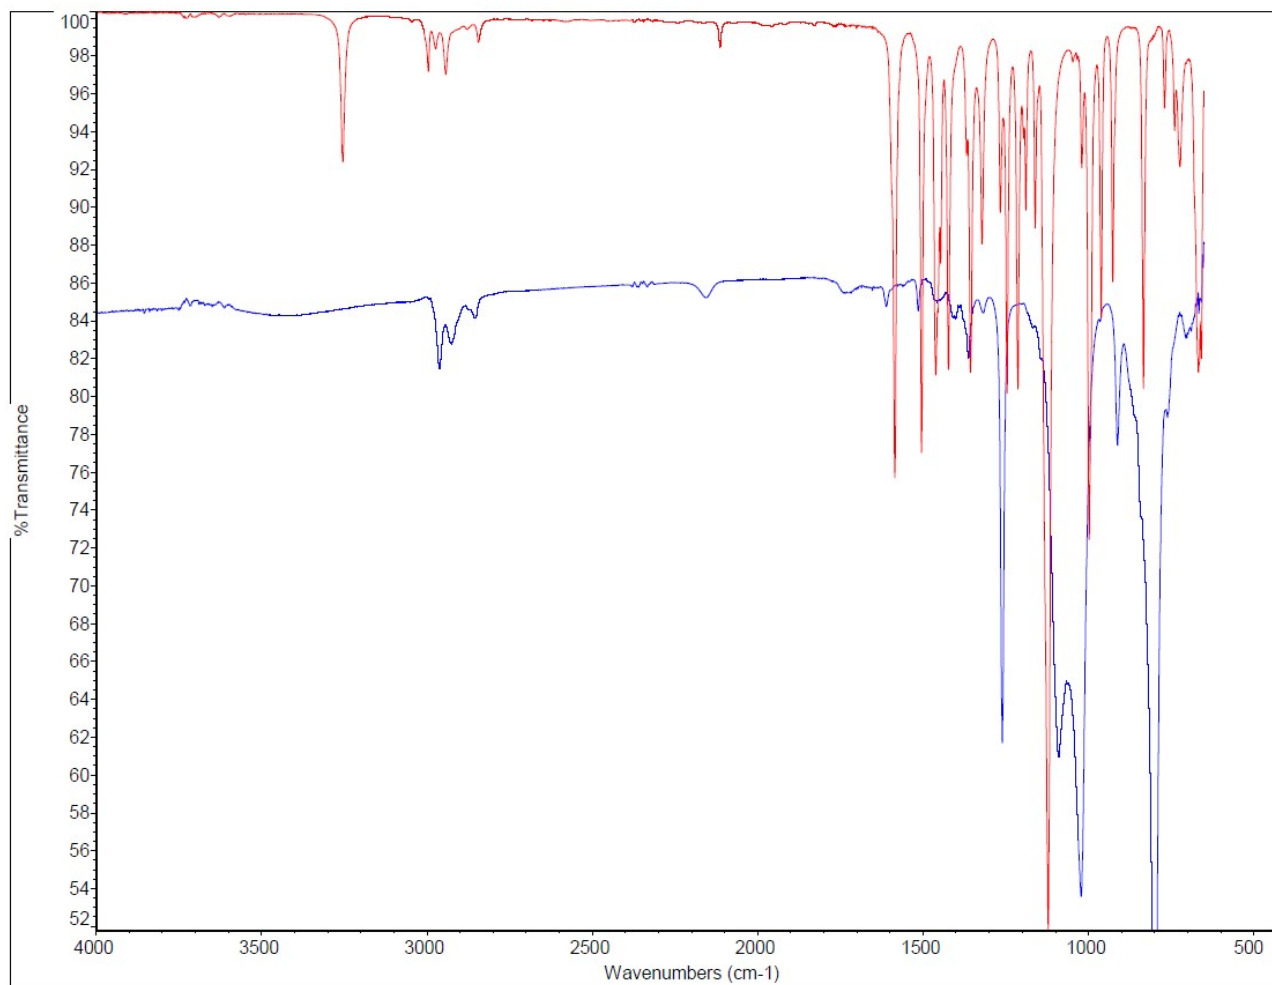

# NMR Spectra of Isolated Compounds

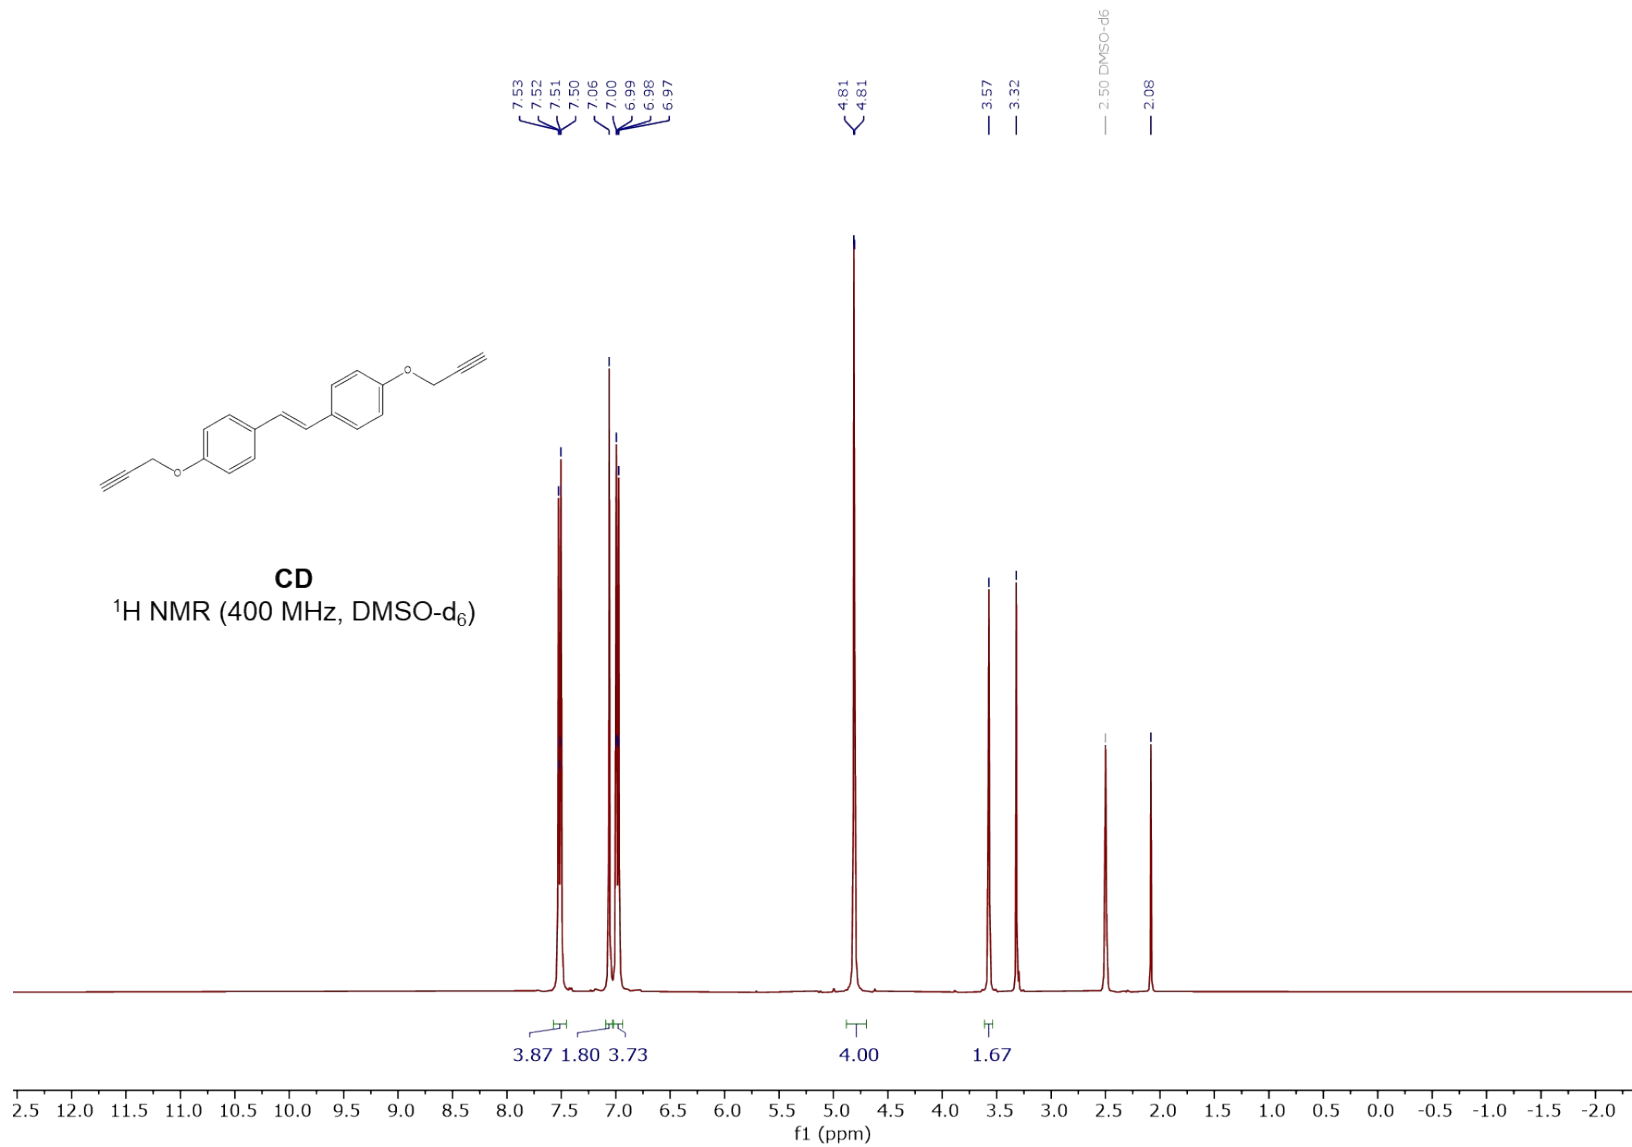

**Figure S30.  $^1\text{H}$  NMR spectrum of CD**

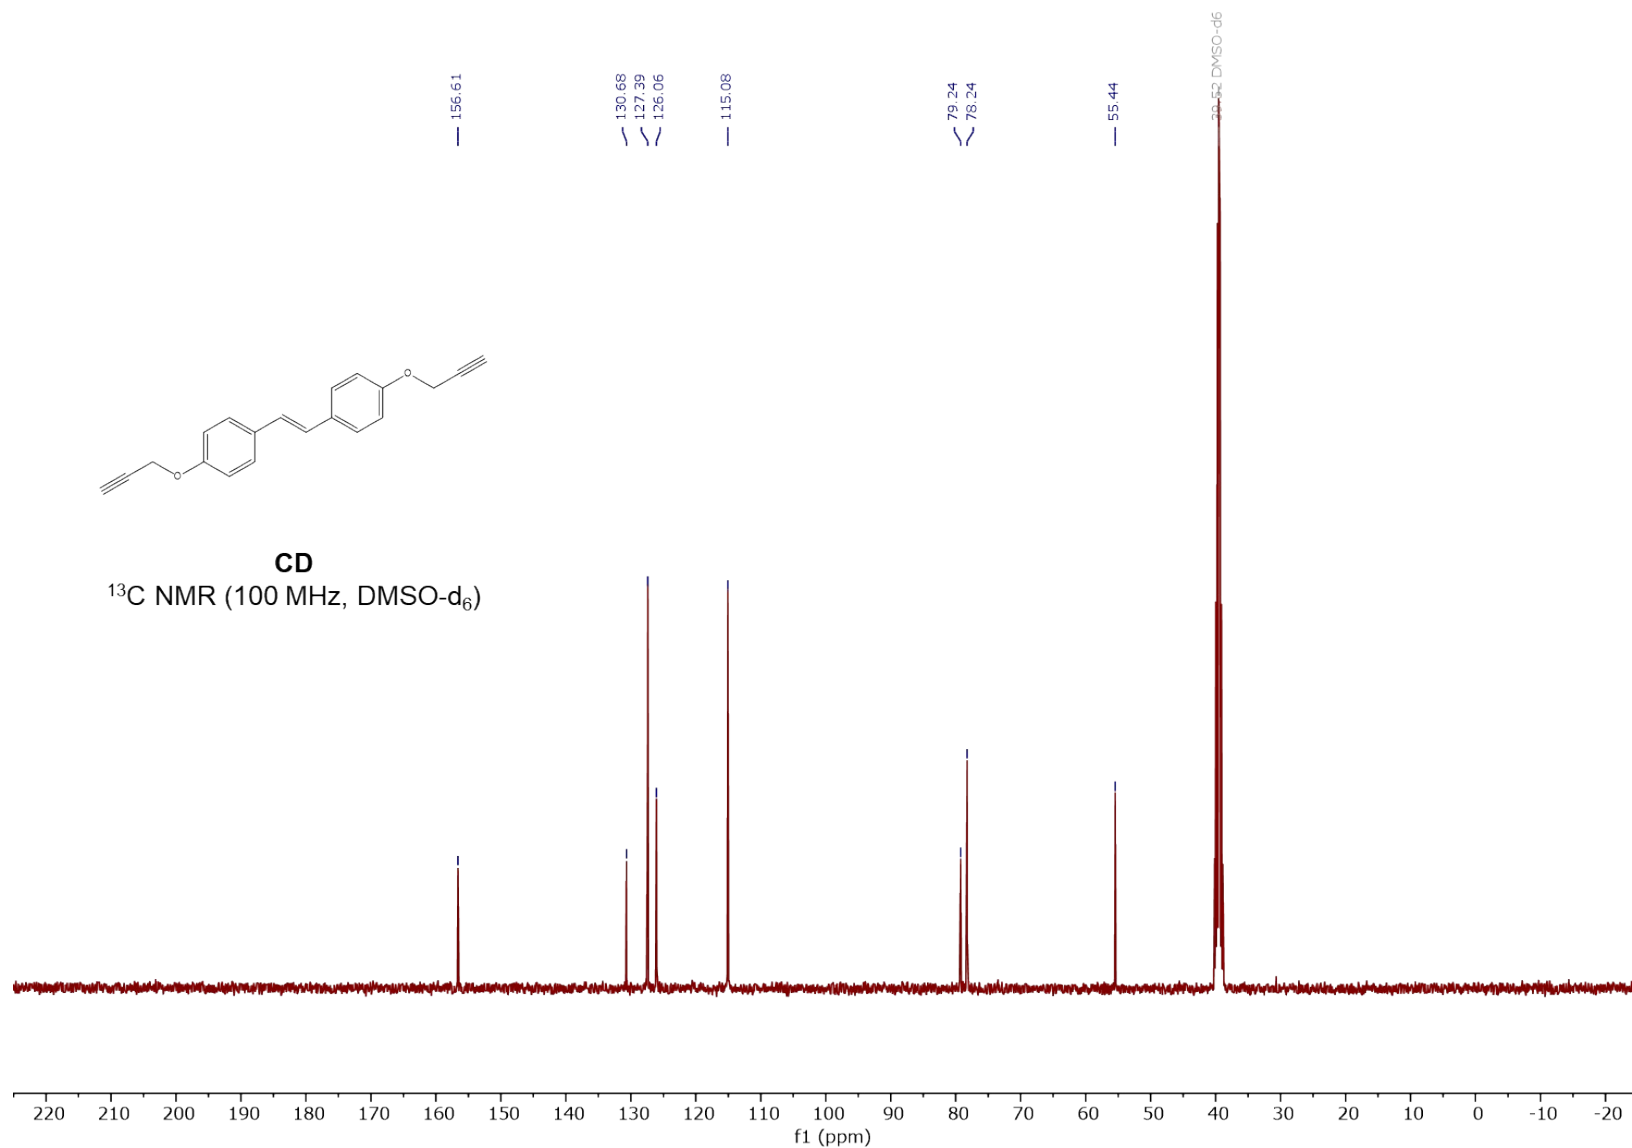

Figure S31.  $^{13}\text{C}$  NMR spectrum of CD



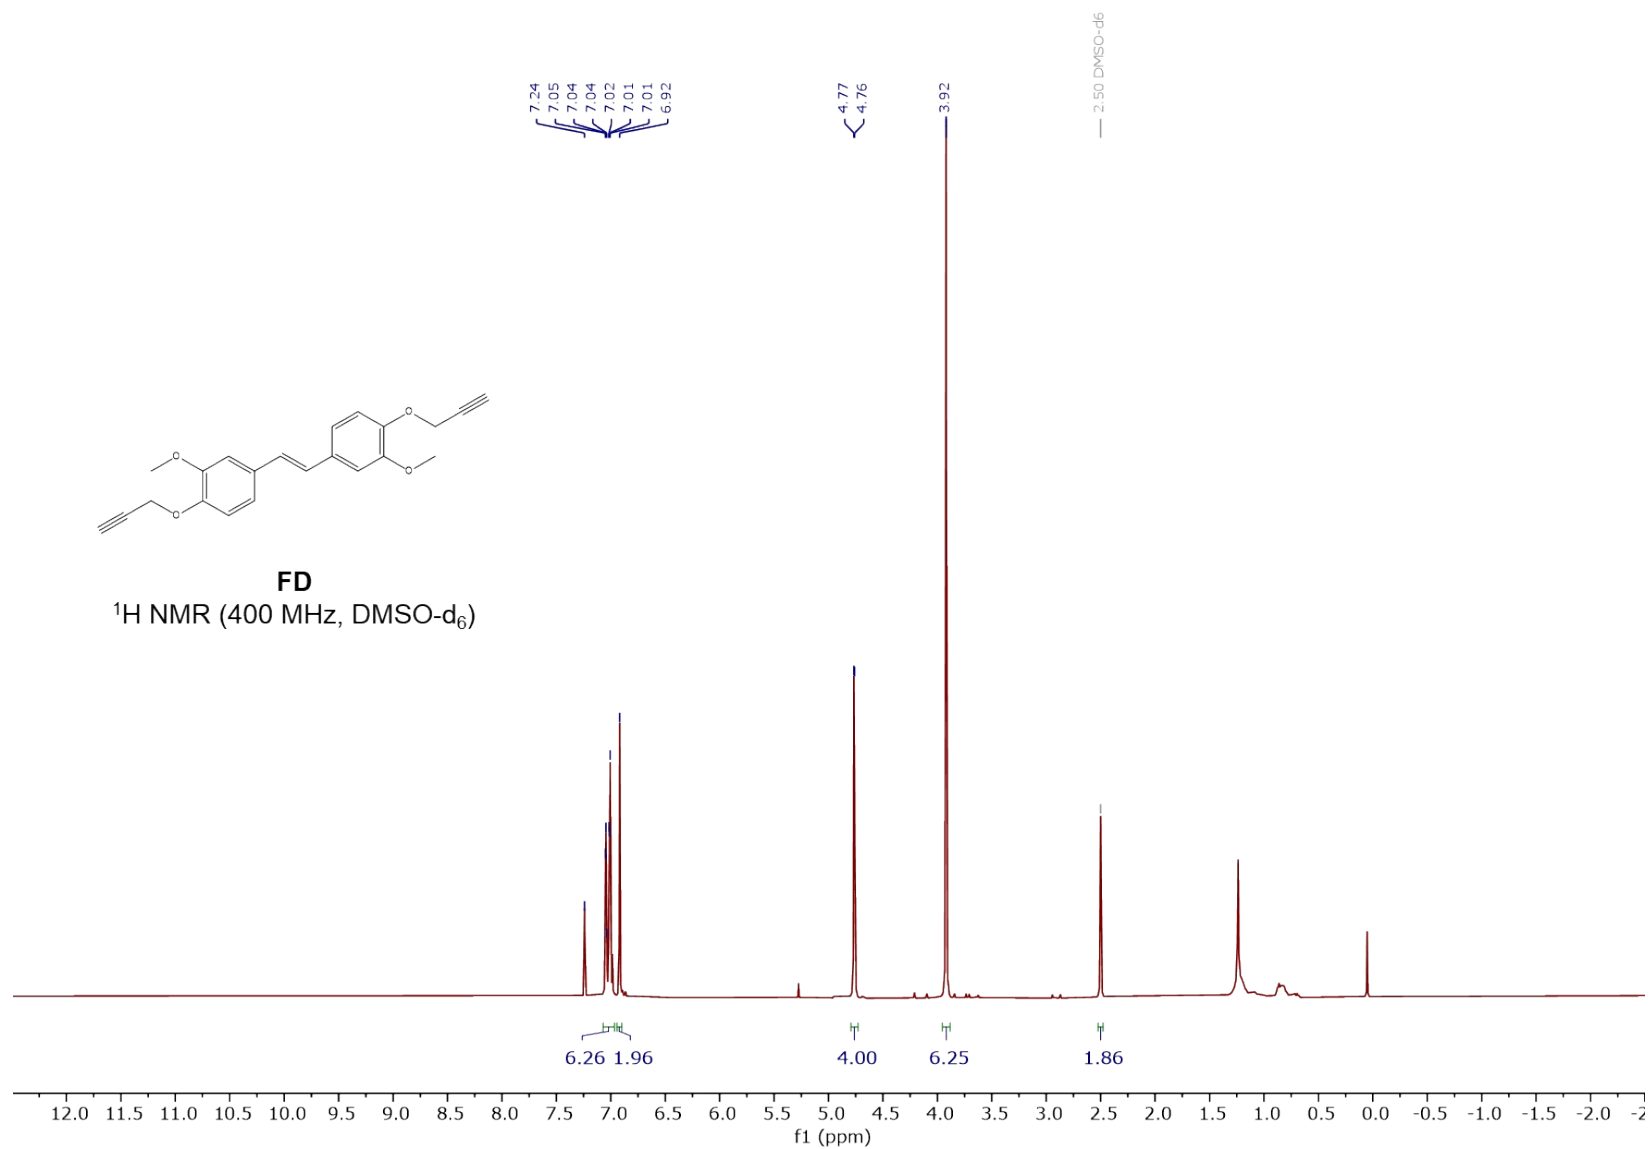

Figure S32.  $^1\text{H}$  NMR spectrum of FD



**Figure S33.  $^{13}\text{C}$  NMR spectrum of FD**



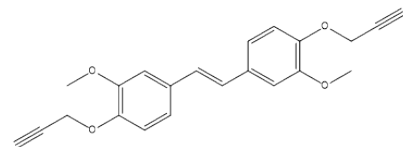

**FD**

$^{13}\text{C}$  NMR (100 MHz,  $\text{CDCl}_3$ )

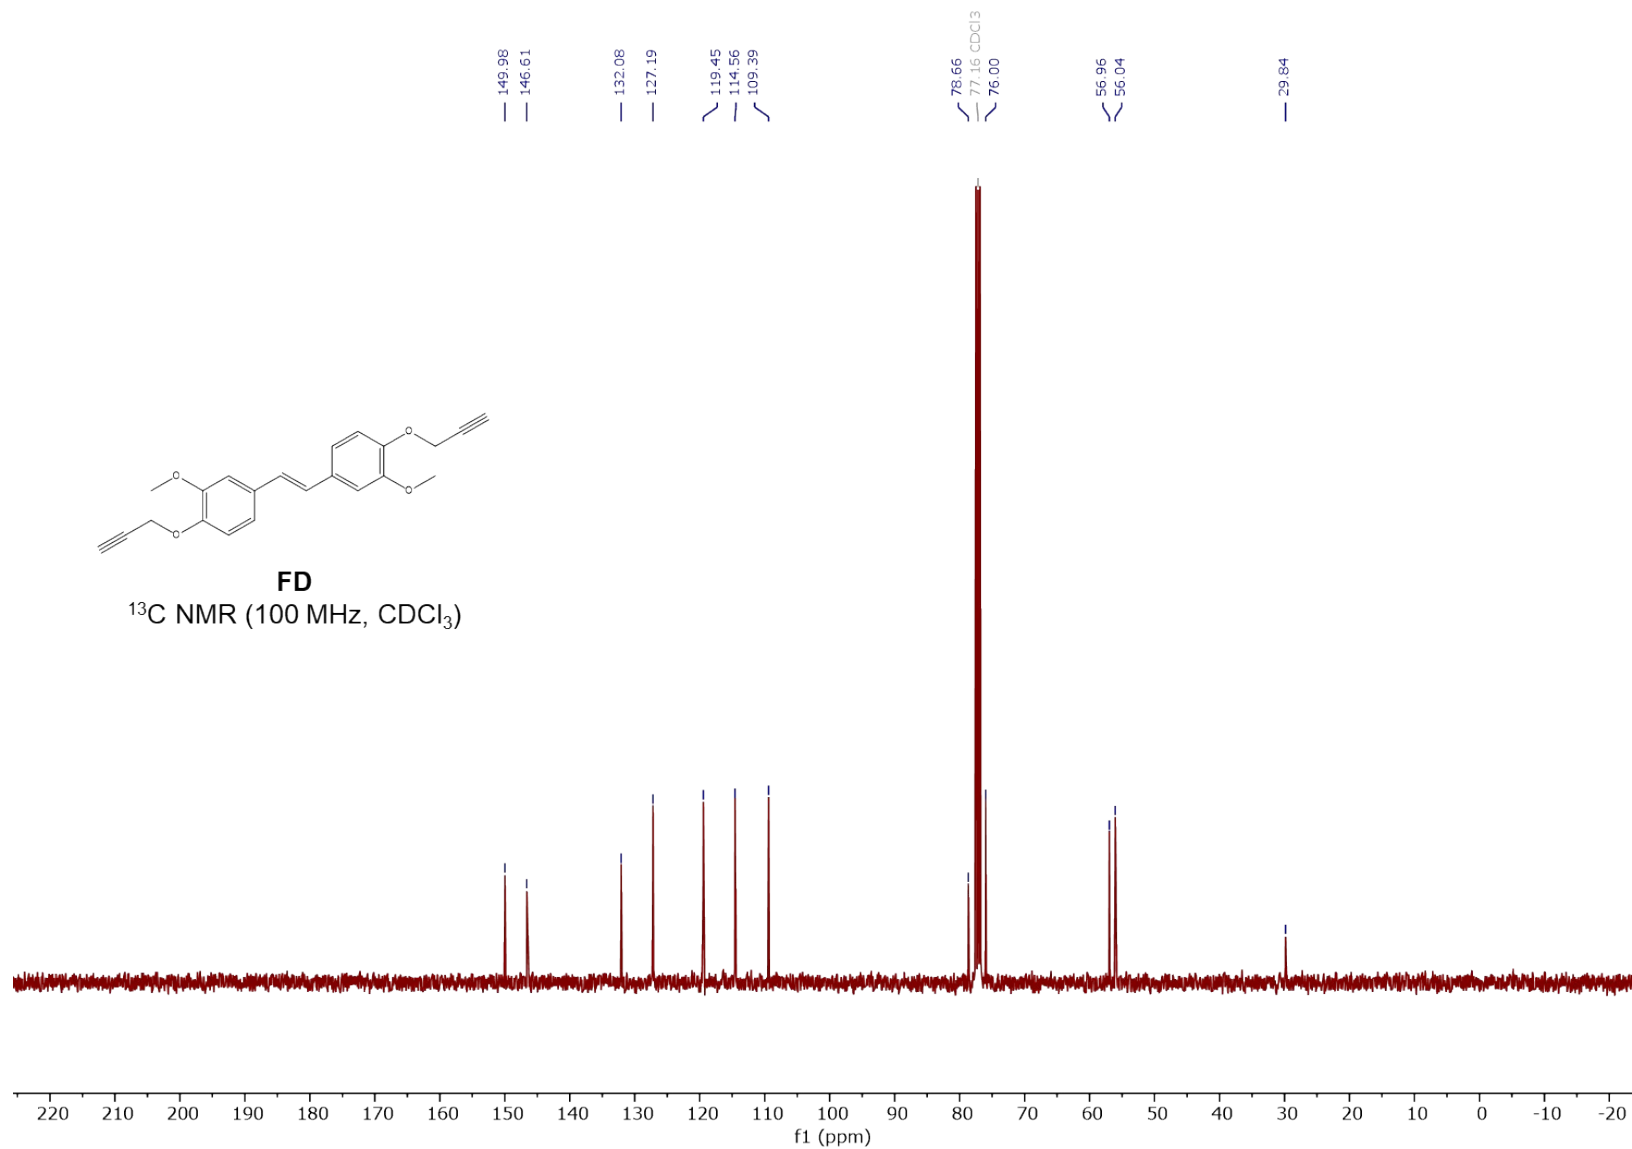

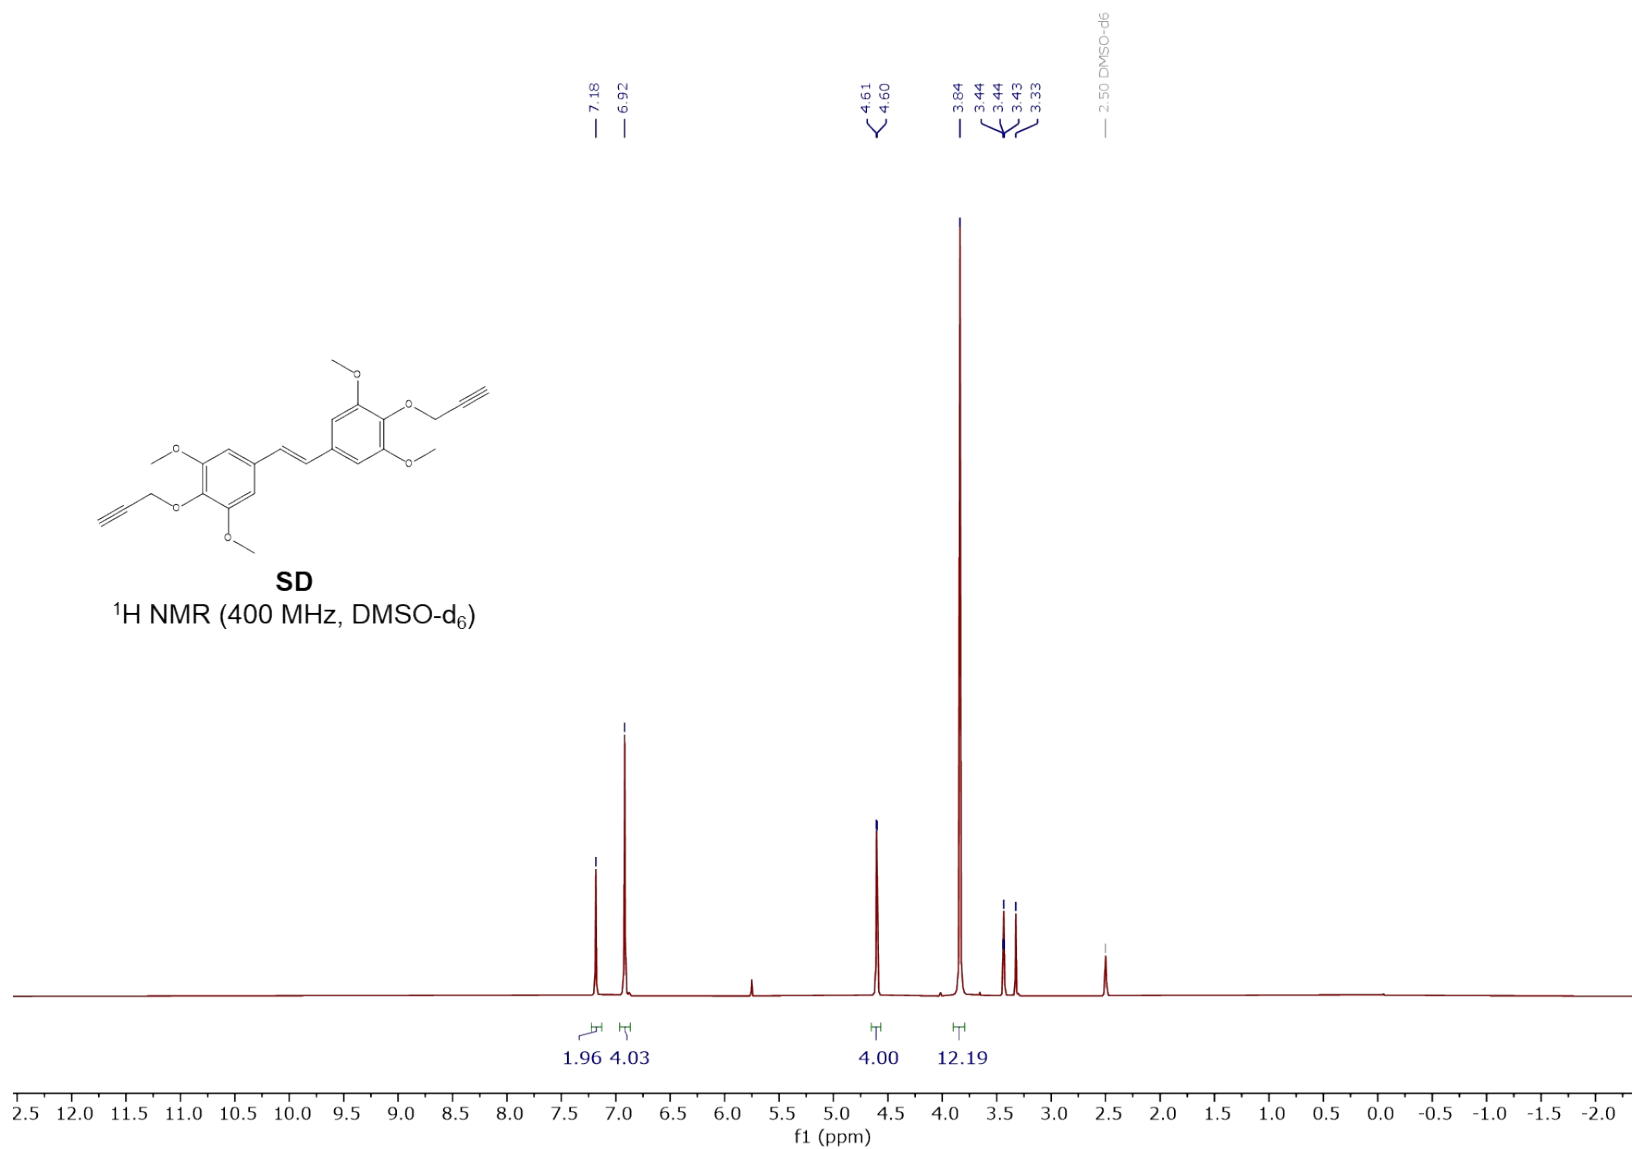

Figure S34.  $^1\text{H}$  NMR spectrum of SD



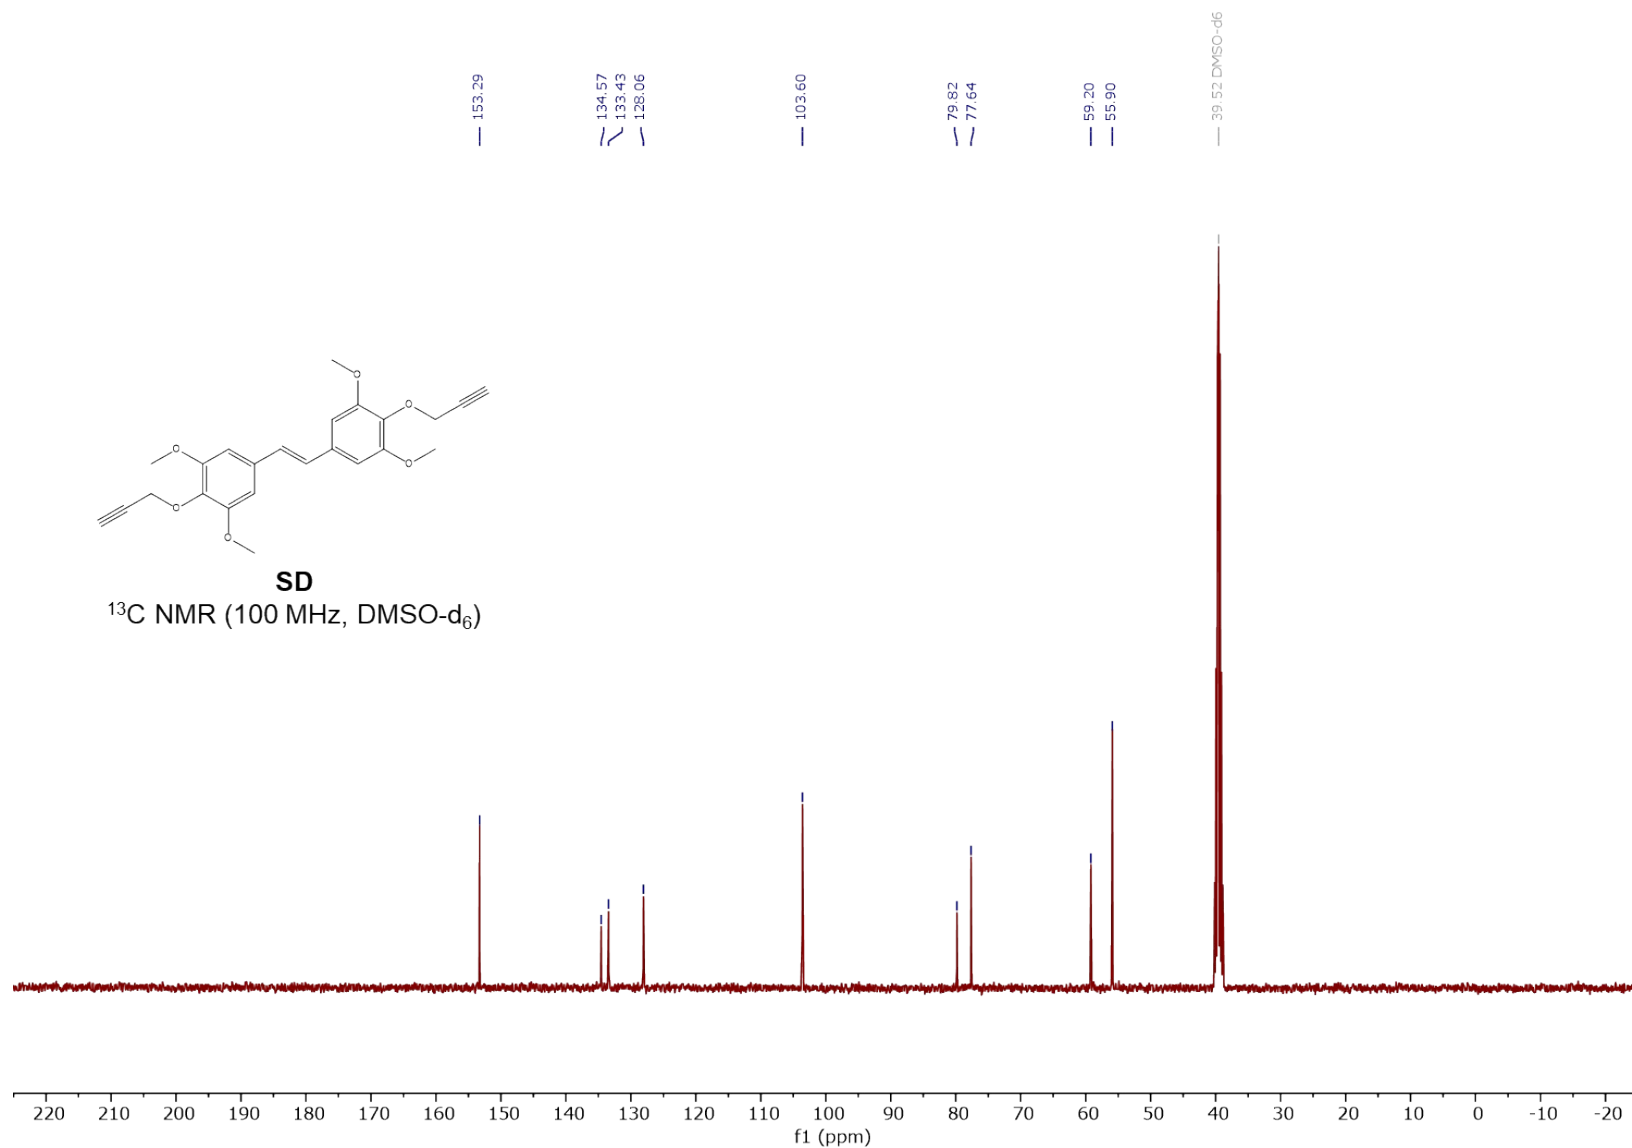

Figure S35. <sup>13</sup>C NMR spectrum of SD



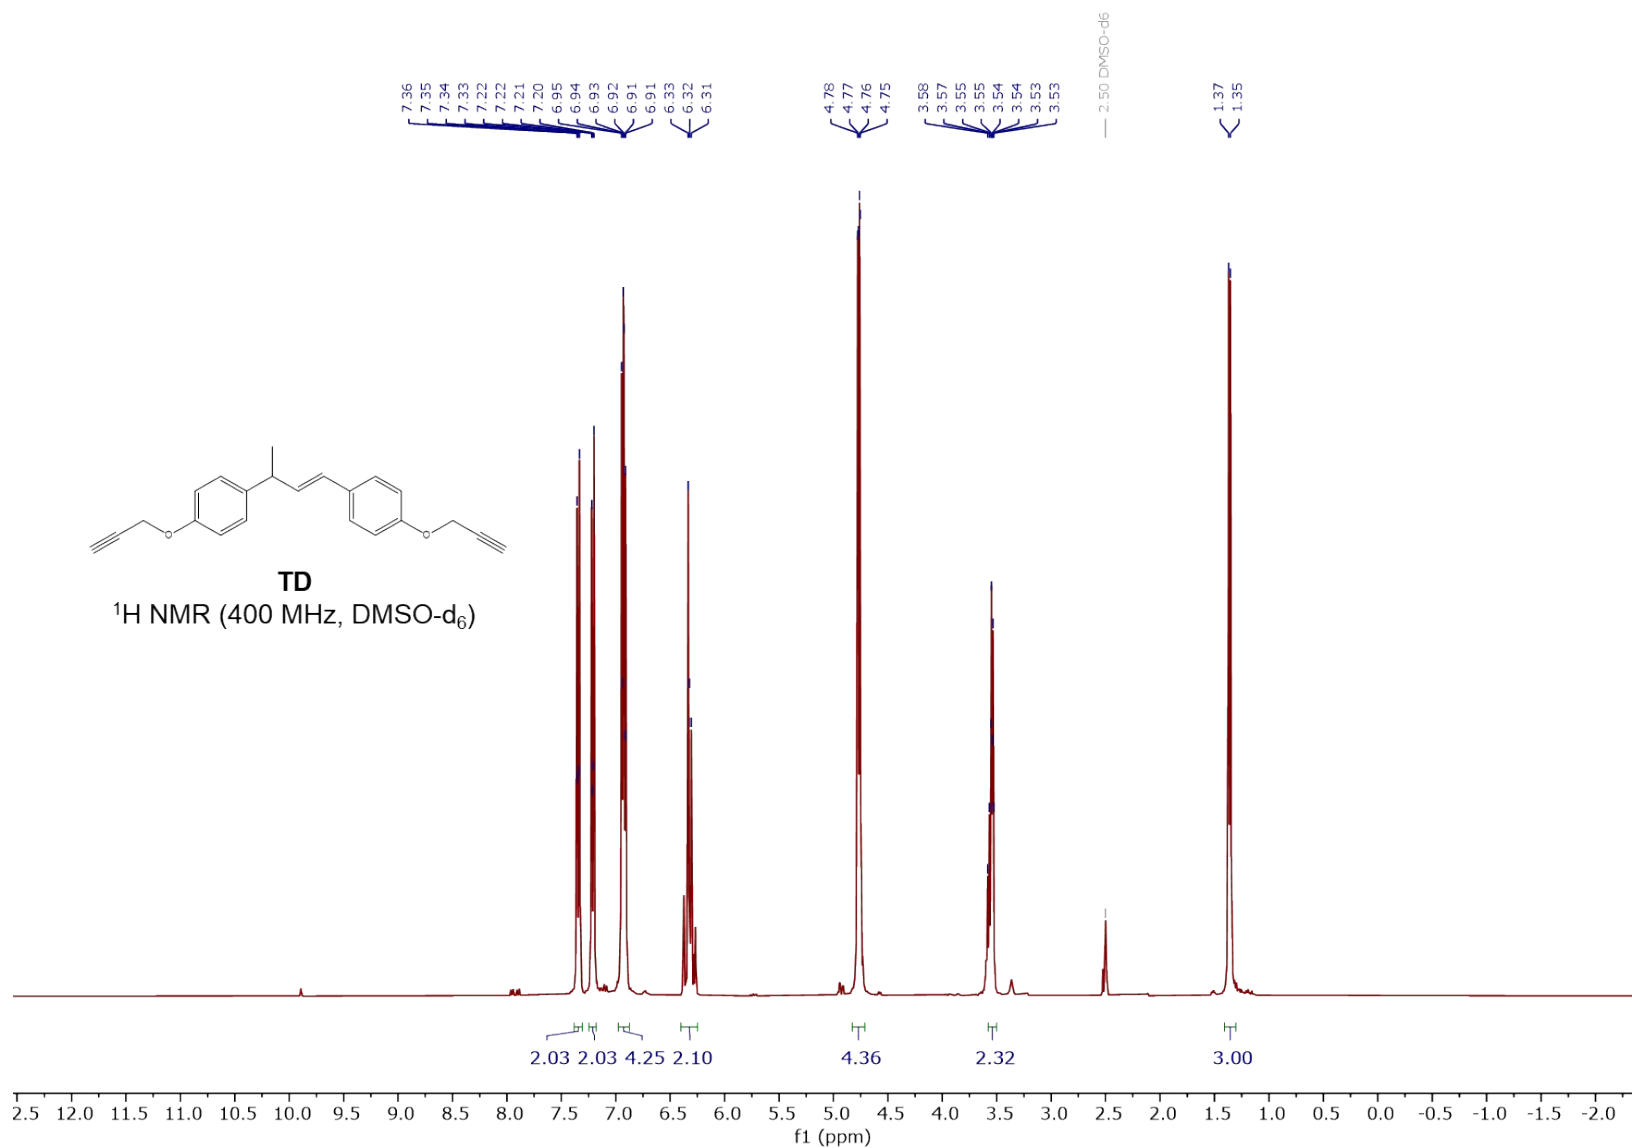

Figure S36. <sup>1</sup>H NMR spectrum of TD



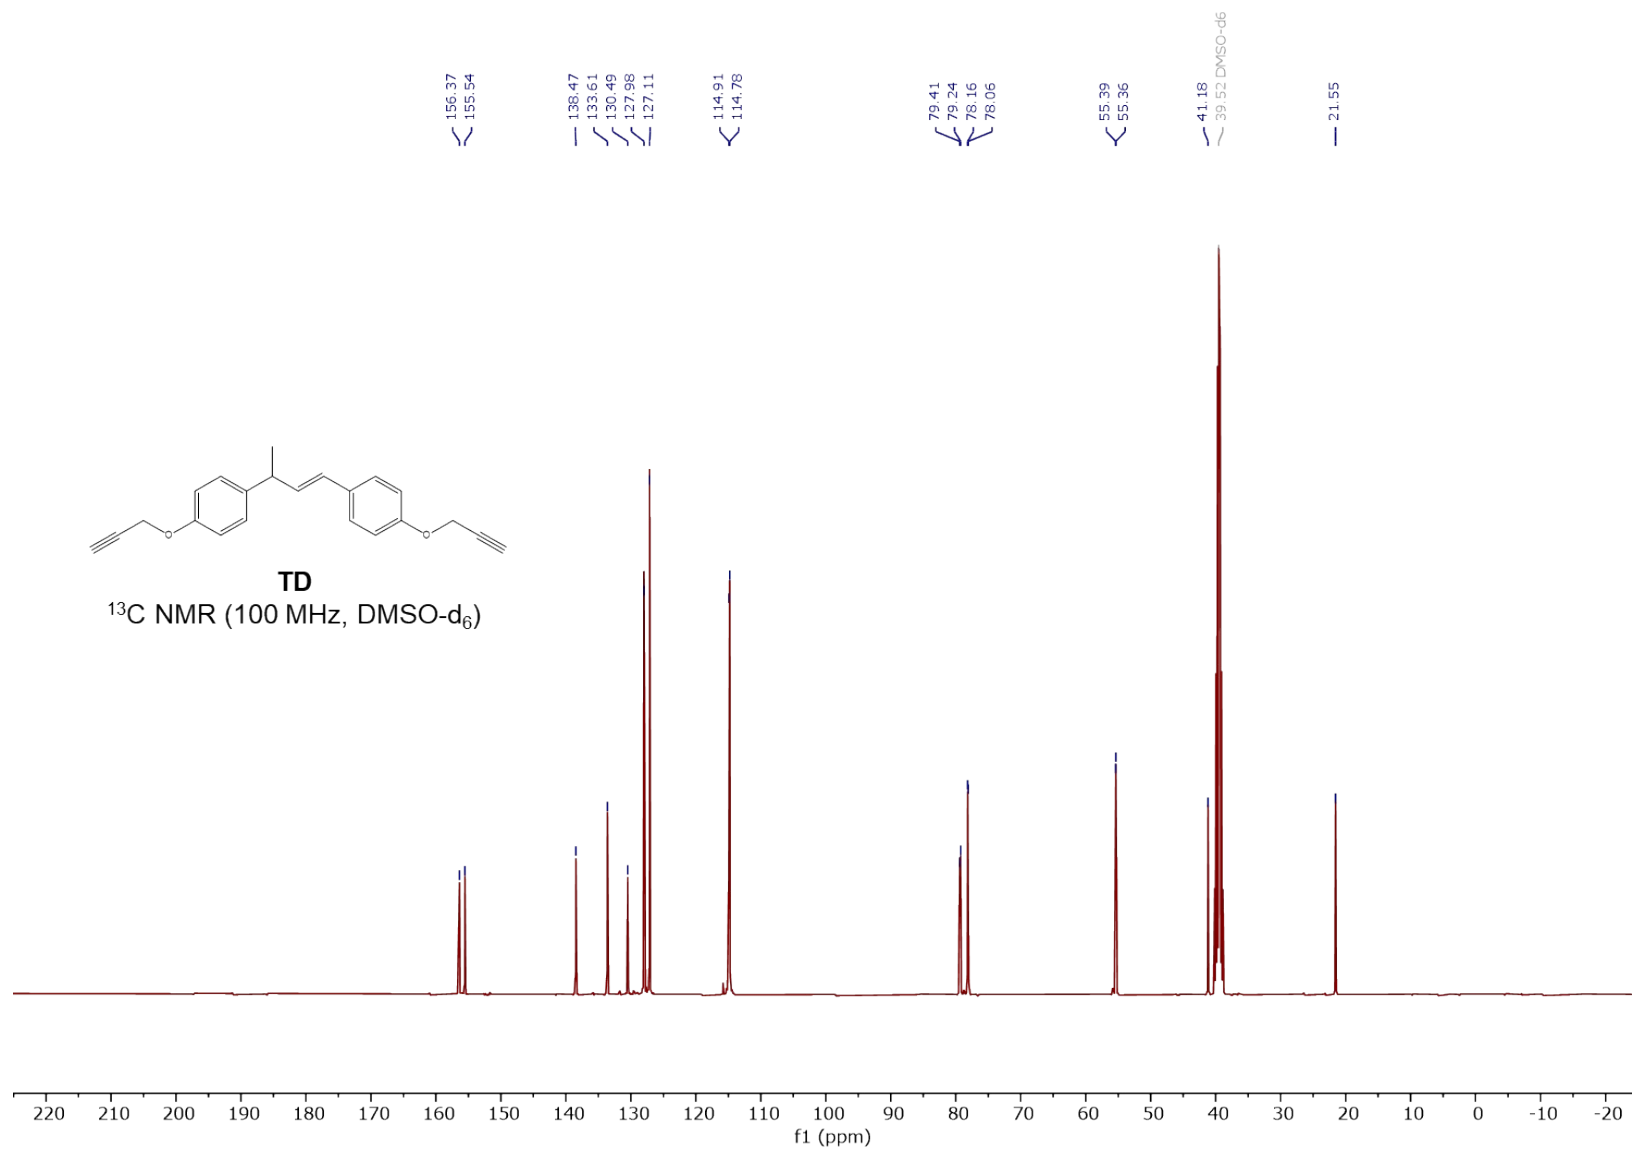

Figure S37. <sup>13</sup>C NMR spectrum of TD





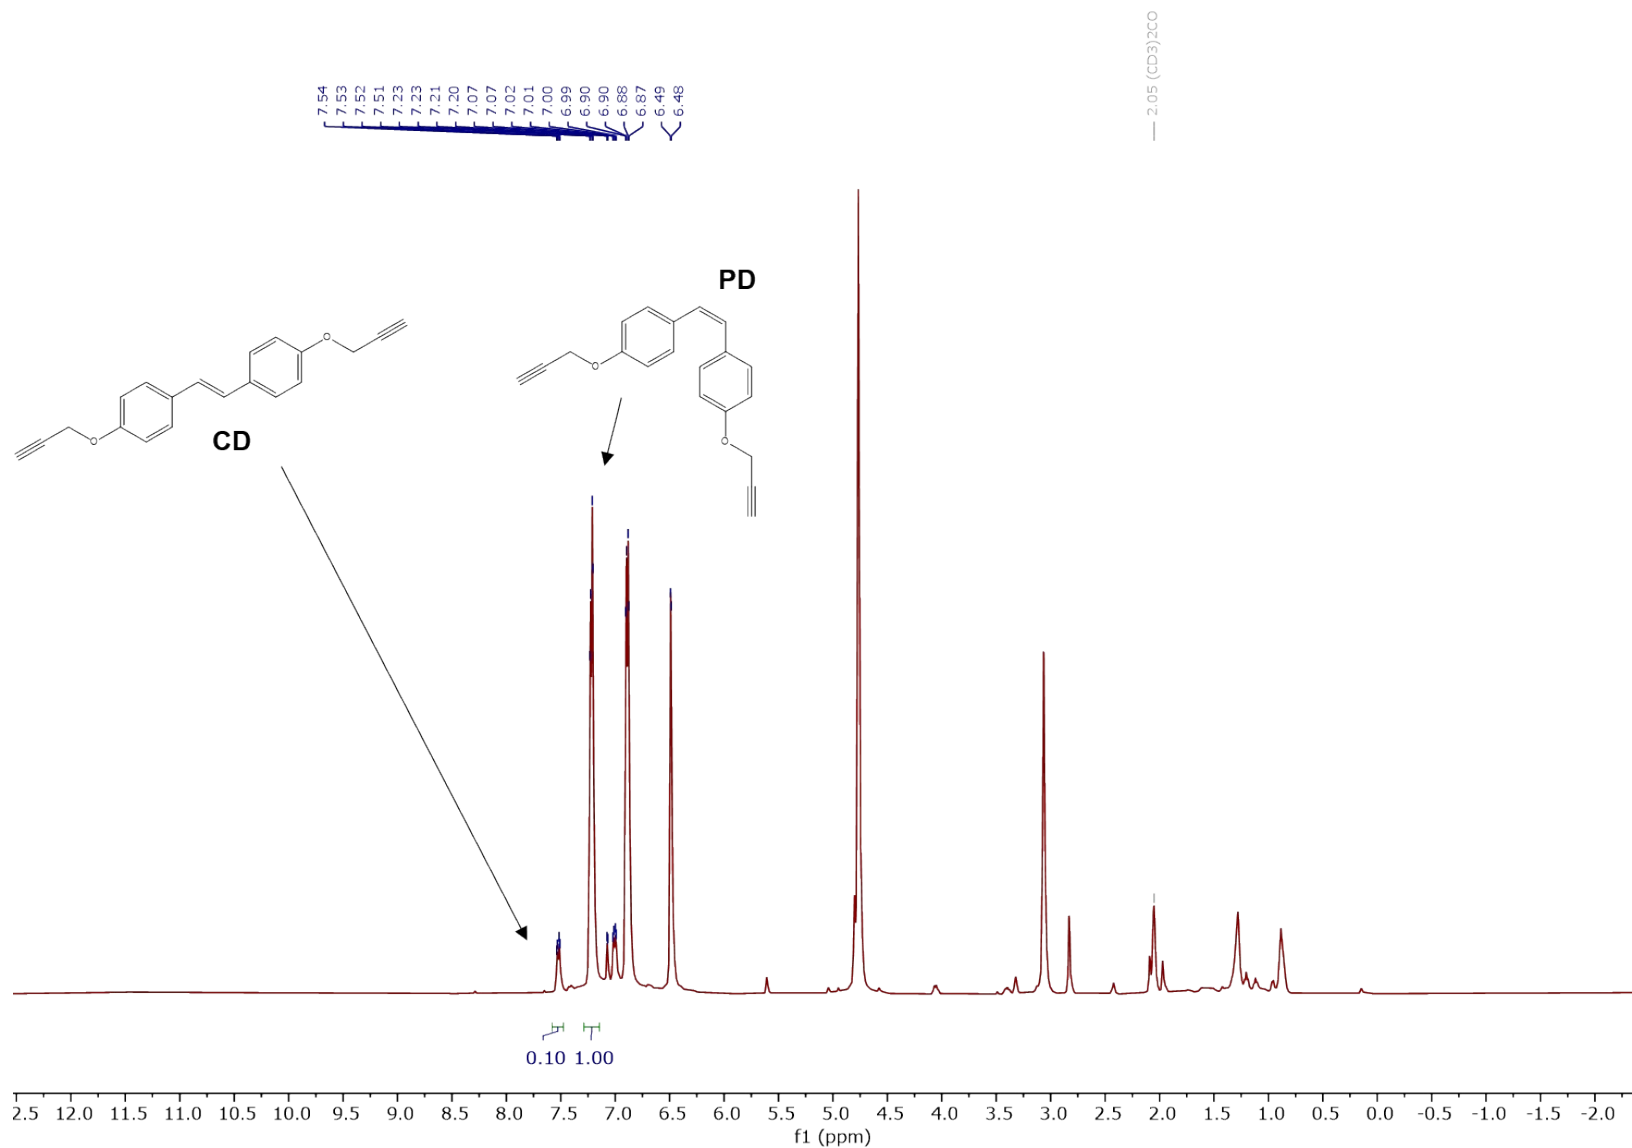

Figure S38. <sup>1</sup>H NMR spectrum of 9:1 PD:CD



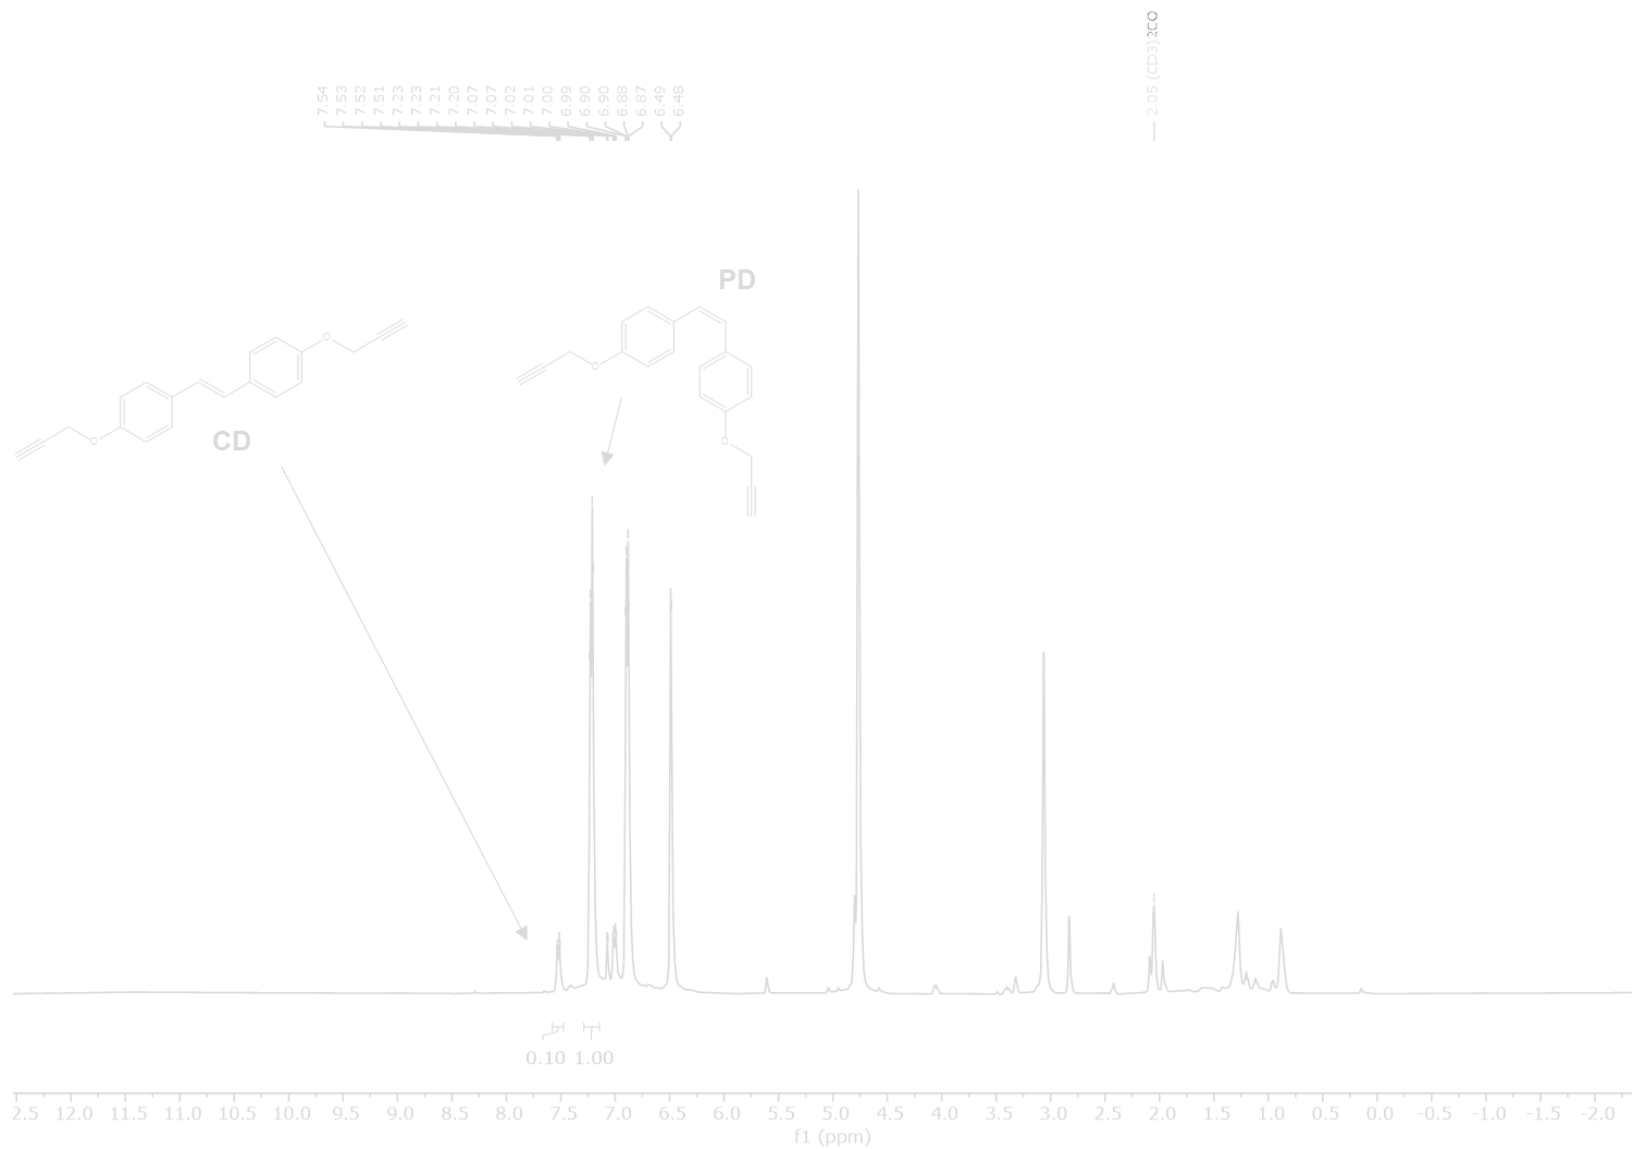

Figure S39. <sup>1</sup>H NMR spectrum of 7:3 PD:CD
